# Supplementary material for: Elucidation of polyethylene glycol adsorption at the solid–H2O(l) interfaces of anatase TiO2(101) using density functional theory and molecular dynamics simulations
Source: Royal Society of Chemistry journal article supplement (doi:10.1039/d3ta05336a), 2023-12-08
Supplement: d3ta05336a1.pdf [file d3ta05336a1.pdf]

## Supplementary Information

### Elucidation of polyethylene glycol adsorption at the solid-H<sub>2</sub>O(l) interfaces of anatase TiO<sub>2</sub>(101) using Density Functional Theory and molecular dynamics simulations

Hee-Joon Chun,<sup>†\*</sup> Kang-Sahn Kim,<sup>†</sup> Giwoong Ha<sup>\*</sup>

*Corporate R&D Institute, Samsung Electro-Mechanics Co., Ltd., 150, Maeyoung-ro, Yeongtong-gu, Suwon, Gyeonggi-do 16674, Republic of Korea*

<sup>†</sup>: equally participated

\*Corresponding authors: [hj.chun@samsung.com](mailto:hj.chun@samsung.com), [giwoong.ha@samsung.com](mailto:giwoong.ha@samsung.com)

### Section S1. AIMD simulations for $H_2O(l)_{1ML}^*$ on $TiO_2(101)$

We have performed the AIMD simulation for  $H_2O(l)_{1ML}^*$  using  $TiO_2(101)$ . All the snapshots at each picosecond (ps) shows 1 monolayer (ML) of  $H_2O^*$ , occupying all the  $Ti_{5C}$  sites. The representative snapshot is provided in Fig. S1. Table S1 shows a comparison of  $H_2O(l)_{1ML}^*$  and  $H_2O(l)_{<1ML}^*$ . The energy difference of these two structures is more than 1 eV, because properties of bulk liquid water (e.g. total number of the hydrogen bond and the water structure) are different. Therefore, a direct comparison is not appropriate for analyzing the adsorption free energy of PEG\*.

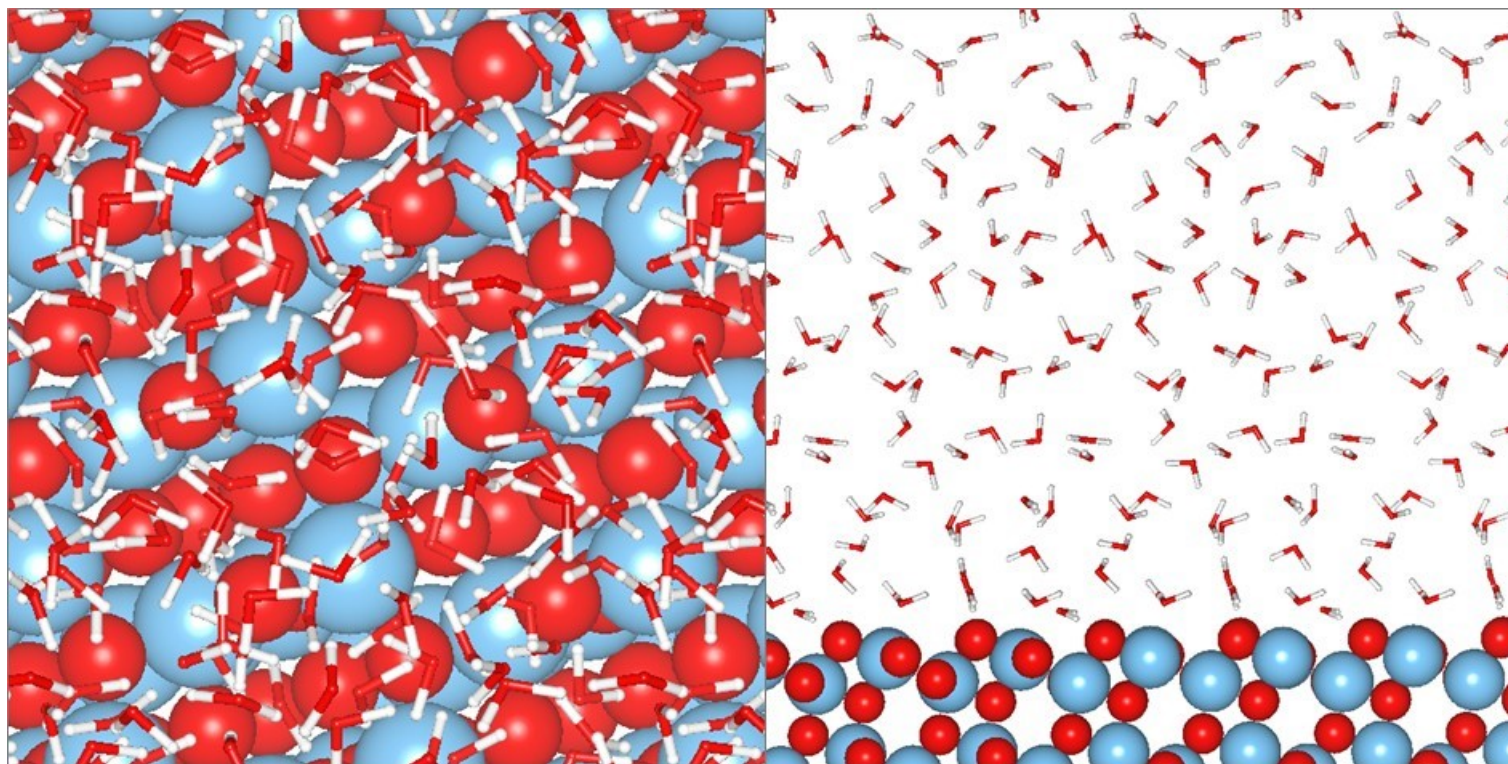

Fig. S1. Representative top and side views of the  $H_2O(l)_{1ML}^*$  on the  $TiO_2(101)$  surface at 10 ps of the AIMD simulation. Water molecules are shown in a simplified form. Light blue, Ti; red, O; white, H.

Table S1. Comparison of  $H_2O(l)_{1ML}^*$  and  $H_2O(l)_{<1ML}^*$

| ps      | $H_2O(l)_{1ML}^*$ |                                                  |                                      | $H_2O(l)_{<1ML}^*$ |                                                  |                                      | $E_{DFT}^{H_2O(l)_{<1ML}^*} - E_{DFT}^{H_2O(l)_{1ML}^*}$<br>(eV) |
|---------|-------------------|--------------------------------------------------|--------------------------------------|--------------------|--------------------------------------------------|--------------------------------------|------------------------------------------------------------------|
|         | $E_{DFT}$ (eV)    | Total number of the hydrogen bond in bulk liquid | $\theta_{H_2O^*}$ (ML) <sup>2)</sup> | $E_{DFT}$ (eV)     | Total number of the hydrogen bond in bulk liquid | $\theta_{H_2O^*}$ (ML) <sup>2)</sup> |                                                                  |
| 1       | -1591.80          | 136                                              | 1.00                                 | -1586.94           | 119                                              | 0.75                                 | 4.86                                                             |
| 2       | -1591.01          | 134                                              | 1.00                                 | -1588.47           | 118                                              | 0.75                                 | 2.55                                                             |
| 3       | -1592.35          | 145                                              | 1.00                                 | -1589.52           | 123                                              | 0.75                                 | 2.82                                                             |
| 4       | -1592.45          | 140                                              | 1.00                                 | -1589.45           | 125                                              | 0.75                                 | 2.99                                                             |
| 5       | -1593.21          | 139                                              | 1.00                                 | -1589.04           | 121                                              | 0.75                                 | 4.17                                                             |
| 6       | -1593.18          | 141                                              | 1.00                                 | -1589.36           | 121                                              | 0.75                                 | 3.82                                                             |
| 7       | -1593.82          | 140                                              | 1.00                                 | -1589.21           | 117                                              | 0.75                                 | 4.60                                                             |
| 8       | -1593.65          | 142                                              | 1.00                                 | -1588.66           | 116                                              | 0.75                                 | 4.99                                                             |
| 9       | -1593.32          | 137                                              | 1.00                                 | -1589.47           | 122                                              | 0.75                                 | 3.85                                                             |
| 10      | -1592.99          | 141                                              | 1.00                                 | -1589.18           | 125                                              | 0.75                                 | 3.80                                                             |
| Average | -1592.78          | 139.50                                           | 1.00                                 | -1588.93           | 120.70                                           | 0.75                                 | 3.85                                                             |

<sup>1)</sup> the corresponding water structure is obtained from the AIMD snapshots of 0.25 ML PEG-5\*.

<sup>2)</sup> the surface coverage of  $H_2O^*$ .

## Section S2. $H_2O$ desorption energy ( $\Delta G_{H_2O^* \rightarrow H_2O(l)}$ )

When adsorbed  $H_2O$  is desorbed from the  $TiO_2$  surface, it loses the adsorption energy while gains solvation energy. From the AIMD snapshots of  $H_2O(l)_{1ML}^*$ , we found that  $H_2O^*$  has hydrogen bonds with water molecules and with the neighboring  $O_{2C}$  atom at the surface (Fig. S2). Thus, the energy of  $H_2O^*$  is calculated based on this configuration using the single point calculations of the obtained AIMD snapshots.

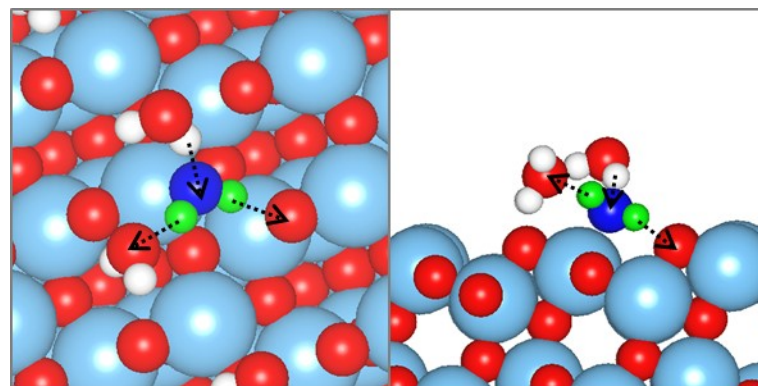

Fig. S2. Top and side views of H<sub>2</sub>O\* on TiO<sub>2</sub>(101). The black arrows represent the hydrogen bonds. Light blue, Ti; red, O; blue, O of H<sub>2</sub>O\*; light green, H of H<sub>2</sub>O\*; white, H.

As for the H<sub>2</sub>O(l) solvation energy, we found that single H<sub>2</sub>O(l) in bulk liquid water has different number of hydrogen bonds. Thus, the water solvation energy was calculated for each case as provided in Table S2.

Table S2. Hydrogen bonds for single H<sub>2</sub>O(l) in  $H_2O(l)_{1ML}^*$ .

| Number of hydrogen bond | Number of H <sub>2</sub> O(l) molecules that has corresponding hydrogen bonds | Solvation energy for single H <sub>2</sub> O(l) (eV) <sup>1)</sup> | Total solvation energy (eV) <sup>2)</sup> |
|-------------------------|-------------------------------------------------------------------------------|--------------------------------------------------------------------|-------------------------------------------|
| 5                       | 2                                                                             | -1.56                                                              | -3.12                                     |
| 4                       | 16                                                                            | -1.25                                                              | -19.97                                    |
| 3                       | 19                                                                            | -0.94                                                              | -17.79                                    |
| 2                       | 22                                                                            | -0.64                                                              | -13.73                                    |
| 1                       | 10                                                                            | -0.31                                                              | -3.12                                     |
| Sum                     | 69                                                                            | -4.68                                                              | -57.73                                    |

$$^1) \text{ Solvation energy (eV)} = E_{DFT, H_2O(l)_x^*} - E_{DFT, H_2O(l)_{x-1}^*} - E_{DFT, H_2O(g)} \quad (x \text{ is the total number of } H_2O(l) \text{ molecules in the unit cell})$$

$$^2) \text{ Total solvation energy (eV)} = \text{Solvation energy (eV)} \times \text{the number of } H_2O(l) \text{ molecules that has corresponding hydrogen bonds.}$$

The average solvation energy for H<sub>2</sub>O(l) ( $E_{solvation}$ ) is the sum of total solvation energy (-57.73 eV) divided by the sum of the number of H<sub>2</sub>O(l) (69), which gives -0.84 eV/H<sub>2</sub>O(l). Thus, we can define the chemical potentials for H<sub>2</sub>O\* and H<sub>2</sub>O(l) as follows:

$$\mu_{H_2O^*} = E_{DFT_{H_2O^*}} + ZPE_{H_2O^*} - T\Delta S_{H_2O^*} \quad (S1)$$

$$\mu_{H_2O(l)} = E_{DFT_{H_2O(g)}} + ZPE_{H_2O(g)} - T\Delta S_{H_2O(g)} + E_{solvation} \quad (S2)$$

where  $E_{DFT}$ ,  $ZPE$ , and  $\Delta S$  are the DFT energy, zero-point energy, and entropy of the species, respectively. The entropy of  $H_2O(g)$  at the standard state was taken from the standard thermodynamic table,<sup>S1</sup> while the corresponding energy for  $H_2O^*$  is calculated using the vibrational frequency based on frustrated translation and rotation.<sup>S2</sup> Putting Equations S1 and S2 in Equation 10 in the main text gives,

$$\Delta G_{H_2O^* \rightarrow H_2O(l)} = E_{DFT_{H_2O(g)}} + ZPE_{H_2O(g)} - T\Delta S_{H_2O(g)} + E_{solvation} + E_{DFT^*} - (E_{DFT_{H_2O^*}} + ZPE_{H_2O^*} - T\Delta S_{H_2O^*}) \quad (S3)$$

Consequently, a value for the desorption free energy for  $H_2O^*$  on  $TiO_2(101)$  is 0.08 eV/ $H_2O$ . This indicates that the process is almost energetically neutral. The total number of adsorbed  $H_2O$  is 4/unit cell (1ML) at  $H_2O(l)_{1ML}^*$  based on our  $TiO_2$  slab model (4  $Ti_{5C}$  sites/unit cell) before PEG adsorption. Thus, the total number of desorbed  $H_2O$  molecules per unit cell ( $N$ ) is determined by,

$$N (\#/unit\ cell) = 4 - \text{the total number of } H_2O^* \text{ at } H_2O(l)_{<1ML}^* \quad (S4)$$

### Section S3. $H_2O^*$ dissociation and $OH^*$ formation on anatase $TiO_2(101)$

To confirm the  $OH^*$  formation on  $TiO_2(101)$ , we performed the kinetic barrier energy calculation for  $H_2O$  dissociation using the nudged elastic band (NEB) method.<sup>S3</sup> Fig. S3 (a) shows the  $H_2O^*$  dissociation kinetic barriers in the presence of zero, single, and full liquid water on the  $TiO_2(101)$  slab where the coverage of PEG-5\* is 0.75 ML. We found that the barrier energy increases with increasing the number of  $H_2O(l)$  because  $H_2O^*$  dissociation requires more energy to break hydrogen bonding which is formed between water molecules. For example, in the presence of full liquid water,  $H_2O^*$  on the surface forms hydrogen bonds with two  $H_2O(l)$  (Fig. S3 (b)), and the hydrogen bonds with these water molecules are broken during a  $H_2O^*$  dissociation pathway. Therefore, the kinetic barrier energy under full liquid  $H_2O(l)$  (1.31 eV) is higher than the barrier from the situation where there is no (0.71 eV) or only single  $H_2O(l)$  (0.73 eV). Based on the harmonic transition state theory, the kinetic barrier of 1.31 eV is energetically insurmountable and therefore it could not generate

the observable rate at the room temperature. Therefore, the OH\* formation is energetically unfavorable on anatase TiO<sub>2</sub>(101) surface and is expected to form no or a very low surface coverage which may not impact on the PEG adsorption.

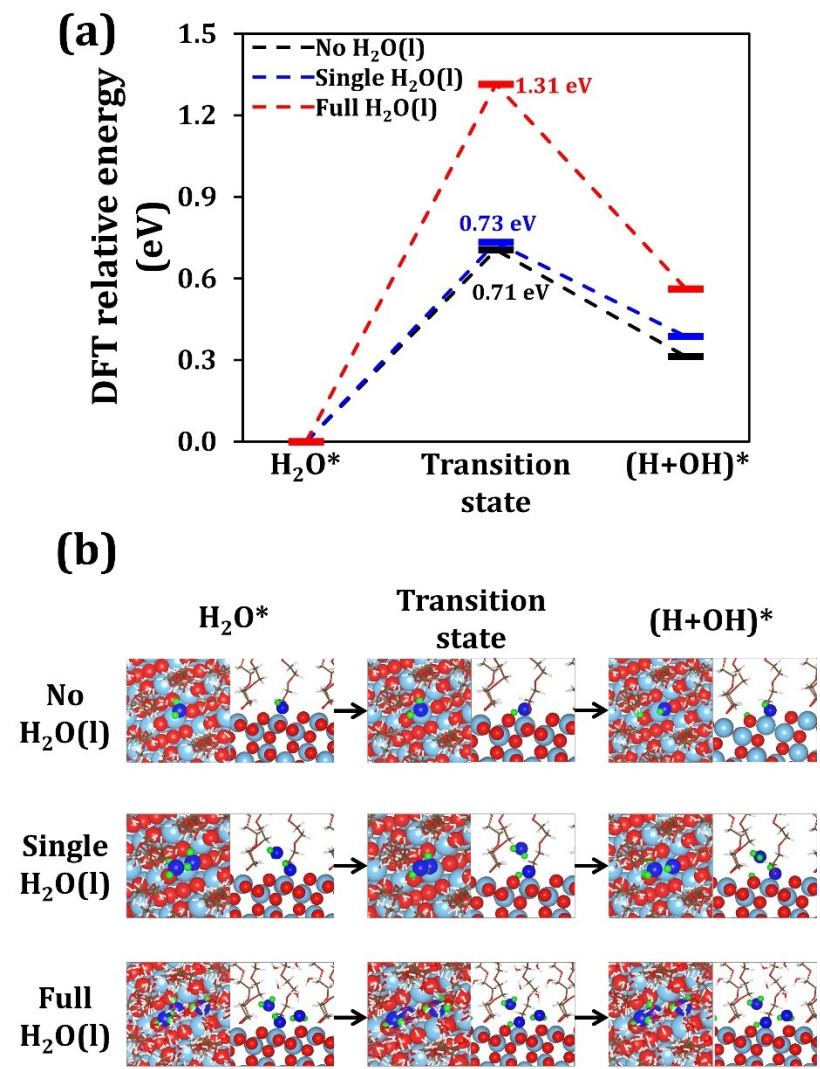

Fig. S3. (a) free energy diagrams for H<sub>2</sub>O\* dissociation on the anatase TiO<sub>2</sub>(101) surface in the presence of PEG-5\* (0.75 ML) and H<sub>2</sub>O(l). The values shown in the plot are the kinetic barrier energies for H<sub>2</sub>O\* dissociation (the color index is the same as the plot). (b) Top and side views of H<sub>2</sub>O\* dissociation in the presence of PEG-5\* (0.75 ML) and H<sub>2</sub>O(l). The PEG-5\* and bulk liquid water molecule are shown as simplified forms, while surface adsorbed H<sub>2</sub>O (H<sub>2</sub>O\*) and surface adjacent H<sub>2</sub>O(l) are described using blue (O) and light green (H) circles. Light blue, Ti; red, O; blue, O of H<sub>2</sub>O\* and surface adjacent H<sub>2</sub>O(l); light green, H of H<sub>2</sub>O\* and surface adjacent H<sub>2</sub>O(l); white, H of PEG\*; brown, C of PEG\*.

#### Section S4. AIMD simulation results for PEG-5\*

Table S3. Data for 0.25 ML PEG-5\* on TiO<sub>2</sub>(101)

| ps      | $E_{DFT}^{(PEG/H_2O(l) < 1ML)}$<br>(eV) | $E_{DFT}^{H_2O(l) < 1ML}$<br>(eV) | $E_{DFT}^{PEG(g)}$<br>(undissociated)<br>(eV) | $E_{DFT}^{PEG^*}$<br>(eV) | $E_{DFT}^*$<br>(slab)<br>(eV) | $E_{DFT}^{PEG}$<br>(dissociated)<br>(eV) <sup>1)</sup> | $E_{DFT}^{PEG(g)}$<br>(dissociated)<br>(eV) <sup>2)</sup> | $E_{DFT}^{PEG\_head^* (adsorption)}$<br>(eV) <sup>3)</sup> | $E_{DFT}^{PEG\_chain^* (interaction)}$<br>(eV) <sup>4)</sup> |
|---------|-----------------------------------------|-----------------------------------|-----------------------------------------------|---------------------------|-------------------------------|--------------------------------------------------------|-----------------------------------------------------------|------------------------------------------------------------|--------------------------------------------------------------|
| 1       | -1805.98                                | -1586.94                          | -212.28                                       | -738.27                   | -524.07                       | -206.31                                                | -206.27                                                   | -1.88                                                      | -0.04                                                        |
| 2       | -1807.58                                | -1588.47                          | -212.28                                       | -738.36                   | -523.96                       | -206.42                                                | -206.38                                                   | -2.08                                                      | -0.04                                                        |
| 3       | -1808.62                                | -1589.52                          | -212.28                                       | -738.42                   | -524.13                       | -206.47                                                | -206.45                                                   | -1.99                                                      | -0.02                                                        |
| 4       | -1808.79                                | -1589.45                          | -212.28                                       | -738.38                   | -524.30                       | -206.46                                                | -206.44                                                   | -1.77                                                      | -0.03                                                        |
| 5       | -1808.24                                | -1589.04                          | -212.28                                       | -738.37                   | -524.37                       | -206.48                                                | -206.45                                                   | -1.69                                                      | -0.02                                                        |
| 6       | -1808.50                                | -1589.36                          | -212.28                                       | -738.47                   | -524.22                       | -206.52                                                | -206.49                                                   | -1.93                                                      | -0.03                                                        |
| 7       | -1808.31                                | -1589.21                          | -212.28                                       | -738.42                   | -524.41                       | -206.50                                                | -206.47                                                   | -1.71                                                      | -0.03                                                        |
| 8       | -1808.26                                | -1588.66                          | -212.28                                       | -738.44                   | -524.30                       | -206.51                                                | -206.47                                                   | -1.82                                                      | -0.04                                                        |
| 9       | -1808.63                                | -1589.47                          | -212.28                                       | -738.43                   | -524.30                       | -206.52                                                | -206.49                                                   | -1.81                                                      | -0.03                                                        |
| 10      | -1808.73                                | -1589.18                          | -212.28                                       | -738.34                   | -524.34                       | -206.46                                                | -206.44                                                   | -1.70                                                      | -0.02                                                        |
| Average | -1808.16                                | -1588.93                          | -212.28                                       | -738.39                   | -524.24                       | -206.47                                                | -206.44                                                   | -1.84 ± 0.12                                               | -0.03 ± 0.01                                                 |

Table S3. continued

| ps | $E_{DFT}^{PEG^* (solvation)}$<br>(eV) <sup>5)</sup> | $\Delta H_{PEG^*}$<br>(eV) <sup>6)</sup> | $E_{DFT}^{PEG\_head^* (adsorption)}$<br>/# of PEG<br>(eV/PEG) <sup>7)</sup> | $E_{DFT}^{PEG\_chain^* (interaction)}$<br>/# of monomer<br>(eV/monomer) <sup>8)</sup> | # <sub>H-bond</sub> <sup>9)</sup> | $E_{DFT}^{PEG^* (solvation)}$<br>/# of O in PEG*<br>(eV/monomer) <sup>10)</sup> | $\theta_{PEG^*}$<br>(ML) <sup>11)</sup> | $\theta_{H_2O^*}$<br>(ML) <sup>12)</sup> | $N^{13)}$ |
|----|-----------------------------------------------------|------------------------------------------|-----------------------------------------------------------------------------|---------------------------------------------------------------------------------------|-----------------------------------|---------------------------------------------------------------------------------|-----------------------------------------|------------------------------------------|-----------|
| 1  | -4.84                                               | -6.76                                    | -1.88                                                                       | -0.01                                                                                 | 9                                 | -0.81                                                                           | 0.25                                    | 0.75                                     | 1         |
| 2  | -4.71                                               | -6.83                                    | -2.08                                                                       | -0.01                                                                                 | 9                                 | -0.78                                                                           | 0.25                                    | 0.75                                     | 1         |
| 3  | -4.81                                               | -6.81                                    | -1.99                                                                       | -0.01                                                                                 | 10                                | -0.80                                                                           | 0.25                                    | 0.75                                     | 1         |
| 4  | -5.26                                               | -7.05                                    | -1.77                                                                       | -0.01                                                                                 | 9                                 | -0.88                                                                           | 0.25                                    | 0.75                                     | 1         |
| 5  | -5.21                                               | -6.92                                    | -1.69                                                                       | -0.01                                                                                 | 10                                | -0.87                                                                           | 0.25                                    | 0.75                                     | 1         |
| 6  | -4.89                                               | -6.86                                    | -1.93                                                                       | -0.01                                                                                 | 8                                 | -0.82                                                                           | 0.25                                    | 0.75                                     | 1         |
| 7  | -5.08                                               | -6.81                                    | -1.71                                                                       | -0.01                                                                                 | 10                                | -0.85                                                                           | 0.25                                    | 0.75                                     | 1         |
| 8  | -5.46                                               | -7.32                                    | -1.82                                                                       | -0.01                                                                                 | 10                                | -0.91                                                                           | 0.25                                    | 0.75                                     | 1         |
| 9  | -5.03                                               | -6.88                                    | -1.81                                                                       | -0.01                                                                                 | 9                                 | -0.84                                                                           | 0.25                                    | 0.75                                     | 1         |
| 10 | -5.54                                               | -7.26                                    | -1.70                                                                       | -0.01                                                                                 | 11                                | -0.92                                                                           | 0.25                                    | 0.75                                     | 1         |

|         |              |              |       |       |      |       |      |      |   |
|---------|--------------|--------------|-------|-------|------|-------|------|------|---|
| Average | -5.08 ± 0.27 | -6.95 ± 0.19 | -1.84 | -0.01 | 9.50 | -0.85 | 0.25 | 0.75 | 1 |
|---------|--------------|--------------|-------|-------|------|-------|------|------|---|

- 1) Single point calculation for dissociated PEG where the structure and unit cell are from  $E_{DFT}^{(PEG/H_2O(l) < 1ML)^*}$
- 2) Single point calculation for dissociated PEG where the structure is from  $E_{DFT}^{(PEG/H_2O(l) < 1ML)^*}$  in a large unit cell (no interactions between PEG)
- 3)  $E_{DFT}^{PEG\_head^*(adsorption)} = E_{DFT}^{(PEG/H_2O(l) < 1ML)^*} - E_{DFT}^{H_2O(l) < 1ML} - E_{DFT}^{PEG(g)} - E_{DFT}^{PEG\_chain^*(interaction)}$
- 4)  $E_{DFT}^{PEG\_chain^*(interaction)} = E_{DFT}^{PEG}^{(dissociated)} - \text{the total number of dissociated PEG}^* \text{ in the unit cell} \times E_{DFT}^{PEG(g)}^{(dissociated)}$
- 5)  $E_{DFT}^{PEG^*(solvation)} = E_{DFT}^{(PEG/H_2O(l) < 1ML)^*} - E_{DFT}^{H_2O(l) < 1ML} - E_{DFT}^{PEG^*} + E_{DFT}^*$
- 6)  $\Delta H_{PEG^*} = E_{DFT}^{PEG\_head^*(adsorption)} + E_{DFT}^{PEG\_chain^*(interaction)} + E_{DFT}^{PEG^*(solvation)}$
- 7)  $\frac{E_{DFT}^{PEG\_head^*(adsorption)}}{\# \text{ of PEG}^*} = \frac{E_{DFT}^{PEG\_head^*(adsorption)}}{\text{the total number of PEG}^* \text{ in the unit cell}}$
- 8)  $\frac{E_{DFT}^{PEG\_chain^*(interaction)}}{\# \text{ of monomer}} = \frac{E_{DFT}^{PEG\_chain^*(interaction)}}{\text{the total number of the PEG}^* \text{ monomer in the unit cell}}$
- 9) the total hydrogen bond number between PEG\* and surrounding H<sub>2</sub>O(l) molecules
- 10)  $\frac{E_{DFT}^{PEG^*(solvation)}}{\# \text{ of O in PEG}^*} = \frac{E_{DFT}^{PEG^*(solvation)}}{\text{the total number of the oxygen atom in PEG}^* \text{ in the unit cell}}$
- 11) the surface coverage of PEG\* in the unit cell
- 12) the surface coverage of H<sub>2</sub>O\* in the unit cell
- 13) the total number of desorbed H<sub>2</sub>O/unit cell during PEG adsorption

Table S4. Data for 0.50 ML PEG-5\* on TiO<sub>2</sub>(101)

| ps | $E_{DFT}^{(PEG/H_2O(l) < 1ML)}$<br>(eV) | $E_{DFT}^{H_2O(l) < 1ML^*}$<br>(eV) | $E_{DFT}^{PEG(g)}$<br>(undissociated)<br>(eV) | $E_{DFT}^{PEG^*}$<br>(eV) | $E_{DFT}^*$<br>(slab)<br>(eV) | $E_{DFT}^{PEG}$<br>(dissociated)<br>(eV) <sup>1)</sup> | $E_{DFT}^{PEG(g)}$<br>(dissociated)<br>(eV) <sup>2)</sup> | $E_{DFT}^{PEG\_head^*(adsorption)}$<br>(eV) <sup>3)</sup> | $E_{DFT}^{PEG\_chain^*(interaction)}$<br>(eV) <sup>4)</sup> |
|----|-----------------------------------------|-------------------------------------|-----------------------------------------------|---------------------------|-------------------------------|--------------------------------------------------------|-----------------------------------------------------------|-----------------------------------------------------------|-------------------------------------------------------------|
| 1  | -1769.15                                | -1331.65                            | -212.28                                       | -952.18                   | -523.05                       | -413.25                                                | -206.35                                                   | -4.01                                                     | -0.56                                                       |
| 2  | -1770.36                                | -1332.38                            | -212.28                                       | -952.05                   | -523.31                       | -413.16                                                | -206.26                                                   | -3.53                                                     | -0.63                                                       |
| 3  | -1770.70                                | -1332.17                            | -212.28                                       | -951.85                   | -523.06                       | -413.02                                                | -206.45                                                   | -4.10                                                     | -0.12                                                       |
| 4  | -1769.36                                | -1331.19                            | -212.28                                       | -952.24                   | -523.33                       | -413.31                                                | -206.37                                                   | -3.78                                                     | -0.57                                                       |
| 5  | -1770.65                                | -1333.62                            | -212.28                                       | -952.26                   | -522.78                       | -413.30                                                | -206.40                                                   | -4.43                                                     | -0.49                                                       |
| 6  | -1770.49                                | -1333.09                            | -212.28                                       | -952.04                   | -522.85                       | -413.31                                                | -206.25                                                   | -3.82                                                     | -0.80                                                       |
| 7  | -1770.96                                | -1332.99                            | -212.28                                       | -952.15                   | -523.14                       | -413.45                                                | -206.35                                                   | -3.70                                                     | -0.74                                                       |
| 8  | -1771.07                                | -1333.32                            | -212.28                                       | -952.36                   | -523.25                       | -413.54                                                | -206.41                                                   | -3.83                                                     | -0.71                                                       |
| 9  | -1771.05                                | -1333.72                            | -212.28                                       | -952.54                   | -523.27                       | -413.64                                                | -206.47                                                   | -3.99                                                     | -0.71                                                       |



|         |          |          |         |         |         |         |         |              |              |
|---------|----------|----------|---------|---------|---------|---------|---------|--------------|--------------|
| 10      | -1771.31 | -1333.84 | -212.28 | -952.49 | -523.25 | -413.59 | -206.45 | -3.98        | -0.69        |
| Average | -1770.51 | -1332.80 | -212.28 | -952.22 | -523.13 | -413.36 | -206.38 | -3.92 ± 0.23 | -0.60 ± 0.18 |

Table S4. continued

| ps      | $E_{DFT}^{PEG^* (solvation)}$<br>(eV) <sup>5)</sup> | $\Delta H_{PEG^*}$<br>(eV) <sup>6)</sup> | $E_{DFT}^{PEG\_head^* (adsorption)}$<br>/# of PEG<br>(eV/PEG) <sup>7)</sup> | $E_{DFT}^{PEG\_chain^* (interaction)}$<br>/# of monomer<br>(eV/monomer) <sup>8)</sup> | # <sub>H-bond</sub> <sup>9)</sup> | $E_{DFT}^{PEG^* (solvation)}$<br>/# of O in PEG*<br>(eV/monomer) <sup>10)</sup> | $\theta_{PEG^*}$<br>(ML) <sup>11)</sup> | $\theta_{H_2O^*}$<br>(ML) <sup>12)</sup> | $N^{13)}$ |
|---------|-----------------------------------------------------|------------------------------------------|-----------------------------------------------------------------------------|---------------------------------------------------------------------------------------|-----------------------------------|---------------------------------------------------------------------------------|-----------------------------------------|------------------------------------------|-----------|
| 1       | -8.36                                               | -12.93                                   | -2.00                                                                       | -0.06                                                                                 | 17                                | -0.70                                                                           | 0.50                                    | 0.50                                     | 2         |
| 2       | -9.25                                               | -13.41                                   | -1.77                                                                       | -0.06                                                                                 | 18                                | -0.77                                                                           | 0.50                                    | 0.50                                     | 2         |
| 3       | -9.73                                               | -13.96                                   | -2.05                                                                       | -0.01                                                                                 | 20                                | -0.81                                                                           | 0.50                                    | 0.50                                     | 2         |
| 4       | -9.25                                               | -13.60                                   | -1.89                                                                       | -0.06                                                                                 | 17                                | -0.77                                                                           | 0.50                                    | 0.50                                     | 2         |
| 5       | -7.54                                               | -12.46                                   | -2.21                                                                       | -0.05                                                                                 | 15                                | -0.63                                                                           | 0.50                                    | 0.50                                     | 2         |
| 6       | -8.21                                               | -12.83                                   | -1.91                                                                       | -0.08                                                                                 | 17                                | -0.68                                                                           | 0.50                                    | 0.50                                     | 2         |
| 7       | -8.96                                               | -13.40                                   | -1.85                                                                       | -0.07                                                                                 | 18                                | -0.75                                                                           | 0.50                                    | 0.50                                     | 2         |
| 8       | -8.63                                               | -13.18                                   | -1.92                                                                       | -0.07                                                                                 | 18                                | -0.72                                                                           | 0.50                                    | 0.50                                     | 2         |
| 9       | -8.06                                               | -12.76                                   | -2.00                                                                       | -0.07                                                                                 | 16                                | -0.67                                                                           | 0.50                                    | 0.50                                     | 2         |
| 10      | -8.23                                               | -12.90                                   | -1.99                                                                       | -0.07                                                                                 | 16                                | -0.69                                                                           | 0.50                                    | 0.50                                     | 2         |
| Average | -8.62 ± 0.63                                        | -13.14 ± 0.43                            | -1.96                                                                       | -0.06                                                                                 | 17.20                             | -0.72                                                                           | 0.50                                    | 0.50                                     | 2.00      |

- 1) Single point calculation for dissociated PEG where the structure and unit cell are from  $E_{DFT}^{(PEG/H_2O(l) < 1ML)^*}$
- 2) Single point calculation for dissociated PEG where the structure is from  $E_{DFT}^{(PEG/H_2O(l) < 1ML)^*}$  in a large unit cell (no interactions between PEG)
- 3)  $E_{DFT}^{PEG\_head^* (adsorption)} = E_{DFT}^{(PEG/H_2O(l) < 1ML)^*} - E_{DFT}^{H_2O(l) < 1ML} - E_{DFT}^{PEG(g) (undissociated)} - \Delta E_{DFT}^{PEG\_chain^* (interaction)}$
- 4)  $E_{DFT}^{PEG\_chain^* (interaction)} = E_{DFT}^{PEG (dissociated)} - \text{the total number of dissociated PEG}^* \text{ in the unit cell} \times E_{DFT}^{PEG(g) (dissociated)}$
- 5)  $E_{DFT}^{PEG^* (solvation)} = E_{DFT}^{(PEG/H_2O(l) < 1ML)^*} - E_{DFT}^{H_2O(l) < 1ML} - E_{DFT}^{PEG^*} + E_{DFT}^*$
- 6)  $\Delta H_{PEG^*} = E_{DFT}^{PEG\_head^* (adsorption)} + E_{DFT}^{PEG\_chain^* (interaction)} + E_{DFT}^{PEG^* (solvation)}$
- 7)  $\frac{E_{DFT}^{PEG\_head^* (adsorption)}}{\text{\# of PEG}^*} = \frac{E_{DFT}^{PEG\_head^* (adsorption)}}{\text{the total number of PEG}^* \text{ in the unit cell}}$
- 8)  $\frac{E_{DFT}^{PEG\_chain^* (interaction)}}{\text{\# of monomer}} = \frac{E_{DFT}^{PEG\_chain^* (interaction)}}{\text{the total number of the PEG}^* \text{ monomer in the unit cell}}$
- 9) the total hydrogen bond number between PEG\* and surrounding H<sub>2</sub>O(l) molecules
- 10)  $\frac{E_{DFT}^{PEG^* (solvation)}}{\text{\# of O in PEG}^*} = \frac{E_{DFT}^{PEG^* (solvation)}}{\text{the total number of the oxygen atom in PEG}^* \text{ in the unit cell}}$

- 1<sup>1)</sup> the surface coverage of PEG\* in the unit cell  
 1<sup>2)</sup> the surface coverage of H<sub>2</sub>O\* in the unit cell  
 1<sup>3)</sup> the total number of desorbed H<sub>2</sub>O/unit cell during PEG adsorption

Table S5. Data for 0.75 ML PEG-5\* on TiO<sub>2</sub>(101)

| ps      | $E_{DFT}^{(PEG/H_2O(l) < 1ML)}$<br>(eV) | $E_{DFT}^{H_2O(l) < 1ML}$<br>(eV) | $E_{DFT}^{PEG(g)}$<br>(undissociated)<br>(eV) | $E_{DFT}^{PEG^*}$<br>(eV) | $E_{DFT}^*$<br>(slab)<br>(eV) | $E_{DFT}^{PEG}$<br>(dissociated)<br>(eV) <sup>1)</sup> | $E_{DFT}^{PEG(g)}$<br>(dissociated)<br>(eV) <sup>2)</sup> | $E_{DFT}^{PEG\_head^* (adsorption)}$<br>(eV) <sup>3)</sup> | $E_{DFT}^{PEG\_chain^* (interaction)}$<br>(eV) <sup>4)</sup> |
|---------|-----------------------------------------|-----------------------------------|-----------------------------------------------|---------------------------|-------------------------------|--------------------------------------------------------|-----------------------------------------------------------|------------------------------------------------------------|--------------------------------------------------------------|
| 1       | -1836.97                                | -1182.47                          | -212.28                                       | -1166.94                  | -521.80                       | -620.68                                                | -206.36                                                   | -6.70                                                      | -1.59                                                        |
| 2       | -1835.99                                | -1182.31                          | -212.28                                       | -1167.22                  | -521.95                       | -620.82                                                | -206.17                                                   | -6.10                                                      | -2.32                                                        |
| 3       | -1837.11                                | -1182.99                          | -212.28                                       | -1167.26                  | -521.99                       | -620.54                                                | -206.25                                                   | -6.63                                                      | -1.80                                                        |
| 4       | -1838.33                                | -1184.46                          | -212.28                                       | -1168.06                  | -522.03                       | -621.32                                                | -206.43                                                   | -7.15                                                      | -2.03                                                        |
| 5       | -1837.96                                | -1184.13                          | -212.28                                       | -1168.10                  | -521.94                       | -621.51                                                | -206.45                                                   | -7.15                                                      | -2.16                                                        |
| 6       | -1837.80                                | -1183.25                          | -212.28                                       | -1168.07                  | -521.91                       | -621.48                                                | -206.55                                                   | -7.47                                                      | -1.83                                                        |
| 7       | -1837.92                                | -1183.60                          | -212.28                                       | -1168.00                  | -521.82                       | -621.53                                                | -206.49                                                   | -7.26                                                      | -2.07                                                        |
| 8       | -1838.59                                | -1184.11                          | -212.28                                       | -1167.95                  | -521.98                       | -621.67                                                | -206.48                                                   | -6.90                                                      | -2.23                                                        |
| 9       | -1838.79                                | -1184.97                          | -212.28                                       | -1167.96                  | -521.67                       | -623.58                                                | -206.52                                                   | -5.42                                                      | -4.03                                                        |
| 10      | -1838.88                                | -1184.90                          | -212.28                                       | -1168.01                  | -521.66                       | -621.72                                                | -206.58                                                   | -7.52                                                      | -1.99                                                        |
| Average | -1837.84                                | -1183.72                          | -212.28                                       | -1167.76                  | -521.87                       | -621.49                                                | -206.43                                                   | -6.83 ± 0.62                                               | -2.21 ± 0.64                                                 |

Table S5. continued

| ps      | $E_{DFT}^{PEG^* (solvation)}$<br>(eV) <sup>5)</sup> | $\Delta H_{PEG^*}$<br>(eV) <sup>6)</sup> | $E_{DFT}^{PEG\_head^* (adsorption)}$<br>/# of PEG<br>(eV/PEG) <sup>7)</sup> | $E_{DFT}^{PEG\_chain^* (interaction)}$<br>/# of monomer<br>(eV/monomer) <sup>8)</sup> | # <sub>H-bond</sub> <sup>9)</sup> | $E_{DFT}^{PEG^* (solvation)}$<br>/# of O in PEG*<br>(eV/monomer) <sup>10)</sup> | $\theta_{PEG^*}$<br>(ML) <sup>11)</sup> | $\theta_{H_2O^*}$<br>(ML) <sup>12)</sup> | $N^{13)}$ |
|---------|-----------------------------------------------------|------------------------------------------|-----------------------------------------------------------------------------|---------------------------------------------------------------------------------------|-----------------------------------|---------------------------------------------------------------------------------|-----------------------------------------|------------------------------------------|-----------|
| 1       | -9.36                                               | -17.65                                   | -2.23                                                                       | -0.11                                                                                 | 20                                | -0.52                                                                           | 0.75                                    | 0.25                                     | 3         |
| 2       | -8.41                                               | -16.83                                   | -2.03                                                                       | -0.15                                                                                 | 19                                | -0.47                                                                           | 0.75                                    | 0.25                                     | 3         |
| 3       | -8.86                                               | -17.28                                   | -2.21                                                                       | -0.12                                                                                 | 20                                | -0.49                                                                           | 0.75                                    | 0.25                                     | 3         |
| 4       | -7.84                                               | -17.02                                   | -2.38                                                                       | -0.14                                                                                 | 15                                | -0.44                                                                           | 0.75                                    | 0.25                                     | 3         |
| 5       | -7.66                                               | -16.98                                   | -2.38                                                                       | -0.14                                                                                 | 15                                | -0.43                                                                           | 0.75                                    | 0.25                                     | 3         |
| 6       | -8.40                                               | -17.70                                   | -2.49                                                                       | -0.12                                                                                 | 17                                | -0.47                                                                           | 0.75                                    | 0.25                                     | 3         |
| 7       | -8.14                                               | -17.47                                   | -2.42                                                                       | -0.14                                                                                 | 16                                | -0.45                                                                           | 0.75                                    | 0.25                                     | 3         |
| 8       | -8.51                                               | -17.63                                   | -2.30                                                                       | -0.15                                                                                 | 16                                | -0.47                                                                           | 0.75                                    | 0.25                                     | 3         |
| 9       | -7.53                                               | -16.97                                   | -1.81                                                                       | -0.27                                                                                 | 16                                | -0.42                                                                           | 0.75                                    | 0.25                                     | 3         |
| 10      | -7.62                                               | -17.13                                   | -2.51                                                                       | -0.13                                                                                 | 15                                | -0.42                                                                           | 0.75                                    | 0.25                                     | 3         |
| Average | -8.23 ± 0.56                                        | -17.27 ± 0.31                            | -2.28                                                                       | -0.15                                                                                 | 16.90                             | -0.46                                                                           | 0.75                                    | 0.25                                     | 3.00      |

- 1<sup>1)</sup> Single point calculation for dissociated PEG where the structure and unit cell are from  $E_{DFT}^{(PEG/H_2O(l) < 1ML)^*}$   
 2<sup>2)</sup> Single point calculation for dissociated PEG where the structure is from  $E_{DFT}^{(PEG/H_2O(l) < 1ML)^*}$  in a large unit cell (no interactions between PEG)  
 $E_{DFT}^{PEG\_head^* (adsorption)} = E_{DFT}^{(PEG/H_2O(l) < 1ML)^*} - E_{DFT}^{H_2O(l) < 1ML} - E_{DFT}^{PEG(g) (undissociated)} - \Delta E_{DFT}^{PEG\_chain^* (interaction)}$   
 3<sup>3)</sup>

$$E_{DFT}^{PEG\_chain^* (interaction)} = E_{DFT}^{PEG (dissociated)} - \text{the total number of dissociated PEG}^* \text{ in the unit cell} \times E_{DFT}^{PEG(g) (dissociated)}$$

$$E_{DFT}^{PEG^* (solvation)} = E_{DFT}^{(PEG/H_2O(l) < 1ML)^*} - E_{DFT}^{H_2O(l) < 1ML^*} - E_{DFT}^{PEG^*} + E_{DFT}^*$$

$$\Delta H_{PEG^*} = E_{DFT}^{PEG\_head^* (adsorption)} + E_{DFT}^{PEG\_chain^* (interaction)} + E_{DFT}^{PEG^* (solvation)}$$

$$\frac{E_{DFT}^{PEG\_head^* (adsorption)}}{\# \text{ of PEG}^*} = \frac{E_{DFT}^{PEG\_head^* (adsorption)}}{\text{the total number of PEG}^* \text{ in the unit cell}}$$

$$\frac{E_{DFT}^{PEG\_chain^* (interaction)}}{\# \text{ of monomer}} = \frac{E_{DFT}^{PEG\_chain^* (interaction)}}{\text{the total number of the PEG}^* \text{ monomer in the unit cell}}$$

$$\frac{E_{DFT}^{PEG^* (solvation)}}{\# \text{ of O in PEG}^*} = \frac{E_{DFT}^{PEG^* (solvation)}}{\text{the total number of the oxygen atom in PEG}^* \text{ in the unit cell}}$$

$$\frac{E_{DFT}^{PEG^* (solvation)}}{\theta_{PEG^*}} = \frac{E_{DFT}^{PEG^* (solvation)}}{\text{the surface coverage of PEG}^* \text{ in the unit cell}}$$

$$\frac{E_{DFT}^{PEG^* (solvation)}}{\theta_{H_2O^*}} = \frac{E_{DFT}^{PEG^* (solvation)}}{\text{the surface coverage of H}_2\text{O}^* \text{ in the unit cell}}$$

$$\frac{E_{DFT}^{PEG^* (solvation)}}{N} = \frac{E_{DFT}^{PEG^* (solvation)}}{\text{the total number of desorbed H}_2\text{O/unit cell during PEG adsorption}}$$

$$\frac{E_{DFT}^{PEG^* (solvation)}}{\theta_{PEG^*}} = \frac{E_{DFT}^{PEG^* (solvation)}}{\text{the surface coverage of PEG}^* \text{ in the unit cell}}$$

$$\frac{E_{DFT}^{PEG^* (solvation)}}{\theta_{H_2O^*}} = \frac{E_{DFT}^{PEG^* (solvation)}}{\text{the surface coverage of H}_2\text{O}^* \text{ in the unit cell}}$$

$$\frac{E_{DFT}^{PEG^* (solvation)}}{N} = \frac{E_{DFT}^{PEG^* (solvation)}}{\text{the total number of desorbed H}_2\text{O/unit cell during PEG adsorption}}$$

Table S6. Data for 1.00 ML PEG-5\* on TiO<sub>2</sub>(101)

| ps      | $E_{DFT}^{(PEG/H_2O(l) < 1ML)}$<br>(eV) | $E_{DFT}^{H_2O(l) < 1ML^*}$<br>(eV) | $E_{DFT}^{PEG(g)}$<br>(undissociated)<br>(eV) | $E_{DFT}^{PEG^*}$<br>(eV) | $E_{DFT}^*$<br>(slab)<br>(eV) | $E_{DFT}^{PEG}$<br>(dissociated)<br>(eV) <sup>1)</sup> | $E_{DFT}^{PEG(g)}$<br>(dissociated)<br>(eV) <sup>2)</sup> | $E_{DFT}^{PEG\_head^* (adsorption)}$<br>(eV) <sup>3)</sup> | $E_{DFT}^{PEG\_chain^* (interaction)}$<br>(eV) <sup>4)</sup> |
|---------|-----------------------------------------|-------------------------------------|-----------------------------------------------|---------------------------|-------------------------------|--------------------------------------------------------|-----------------------------------------------------------|------------------------------------------------------------|--------------------------------------------------------------|
| 1       | -1888.53                                | -1022.83                            | -212.28                                       | -1383.55                  | -522.03                       | -835.67                                                | -212.15                                                   | -7.96                                                      | -4.44                                                        |
| 2       | -1889.34                                | -1023.66                            | -212.28                                       | -1383.59                  | -521.88                       | -835.73                                                | -212.30                                                   | -7.65                                                      | -4.93                                                        |
| 3       | -1889.55                                | -1023.89                            | -212.28                                       | -1384.15                  | -522.16                       | -835.80                                                | -212.34                                                   | -8.14                                                      | -4.71                                                        |
| 4       | -1889.23                                | -1023.31                            | -212.28                                       | -1383.59                  | -521.81                       | -835.79                                                | -212.29                                                   | -8.43                                                      | -4.21                                                        |
| 5       | -1889.01                                | -1022.78                            | -212.28                                       | -1383.40                  | -521.48                       | -835.85                                                | -212.31                                                   | -8.58                                                      | -4.20                                                        |
| 6       | -1889.71                                | -1022.99                            | -212.28                                       | -1383.80                  | -521.81                       | -835.95                                                | -212.24                                                   | -8.78                                                      | -4.06                                                        |
| 7       | -1889.36                                | -1022.67                            | -212.28                                       | -1383.73                  | -521.85                       | -835.92                                                | -212.13                                                   | -8.41                                                      | -4.34                                                        |
| 8       | -1889.37                                | -1023.16                            | -212.28                                       | -1383.84                  | -521.93                       | -835.98                                                | -212.19                                                   | -8.43                                                      | -4.34                                                        |
| 9       | -1890.06                                | -1023.69                            | -212.28                                       | -1383.84                  | -521.86                       | -836.00                                                | -212.25                                                   | -8.64                                                      | -4.20                                                        |
| 10      | -1889.66                                | -1023.92                            | -212.28                                       | -1383.92                  | -521.91                       | -836.25                                                | -212.25                                                   | -8.61                                                      | -4.27                                                        |
| Average | -1889.38                                | -1023.29                            | -212.28                                       | -1383.74                  | -521.87                       | -835.90                                                | -212.24                                                   | -8.36 ± 0.33                                               | -4.37 ± 0.25                                                 |

Table S6. continued

| ps | $E_{DFT}^{PEG^* (solvation)}$<br>(eV) <sup>5)</sup> | $\Delta H_{PEG^*}$<br>(eV) <sup>6)</sup> | $E_{DFT}^{PEG\_head^* (adsorption)}$<br>/# of PEG<br>(eV/PEG) <sup>7)</sup> | $E_{DFT}^{PEG\_chain^* (interaction)}$<br>/# of monomer<br>(eV/monomer) <sup>8)</sup> | $\#_{H-bond}$ <sup>9)</sup> | $E_{DFT}^{PEG^* (solvation)}$<br>/# of O in PEG*<br>(eV/monomer) <sup>10)</sup> | $\theta_{PEG^*}$<br>(ML) <sup>11)</sup> | $\theta_{H_2O^*}$<br>(ML) <sup>12)</sup> | $N$ <sup>13)</sup> |
|----|-----------------------------------------------------|------------------------------------------|-----------------------------------------------------------------------------|---------------------------------------------------------------------------------------|-----------------------------|---------------------------------------------------------------------------------|-----------------------------------------|------------------------------------------|--------------------|
|----|-----------------------------------------------------|------------------------------------------|-----------------------------------------------------------------------------|---------------------------------------------------------------------------------------|-----------------------------|---------------------------------------------------------------------------------|-----------------------------------------|------------------------------------------|--------------------|

|         |              |               |       |       |       |       |      |      |      |
|---------|--------------|---------------|-------|-------|-------|-------|------|------|------|
| 1       | -4.17        | -16.56        | -1.99 | -0.22 | 13    | -0.17 | 1.00 | 0.00 | 4    |
| 2       | -3.96        | -16.54        | -1.91 | -0.25 | 12    | -0.16 | 1.00 | 0.00 | 4    |
| 3       | -3.67        | -16.52        | -2.03 | -0.24 | 11    | -0.15 | 1.00 | 0.00 | 4    |
| 4       | -4.14        | -16.78        | -2.11 | -0.21 | 13    | -0.17 | 1.00 | 0.00 | 4    |
| 5       | -4.31        | -17.09        | -2.14 | -0.21 | 12    | -0.18 | 1.00 | 0.00 | 4    |
| 6       | -4.74        | -17.59        | -2.20 | -0.20 | 13    | -0.20 | 1.00 | 0.00 | 4    |
| 7       | -4.80        | -17.55        | -2.10 | -0.22 | 13    | -0.20 | 1.00 | 0.00 | 4    |
| 8       | -4.31        | -17.08        | -2.11 | -0.22 | 13    | -0.18 | 1.00 | 0.00 | 4    |
| 9       | -4.39        | -17.24        | -2.16 | -0.21 | 13    | -0.18 | 1.00 | 0.00 | 4    |
| 10      | -3.74        | -16.61        | -2.15 | -0.21 | 12    | -0.16 | 1.00 | 0.00 | 4    |
| Average | -4.22 ± 0.36 | -16.96 ± 0.39 | -2.09 | -0.22 | 12.50 | -0.18 | 1.00 | 0.00 | 4.00 |

$$E_{DFT}^{(PEG/H_2O(l) < 1ML)^*}$$

1) Single point calculation for dissociated PEG where the structure and unit cell are from

$$E_{DFT}^{(PEG/H_2O(l) < 1ML)^*}$$

2) Single point calculation for dissociated PEG where the structure is from  $E_{DFT}^{(PEG/H_2O(l) < 1ML)^*}$  in a large unit cell (no interactions between PEG)

$$E_{DFT}^{PEG\_head^*(adsorption)} = E_{DFT}^{(PEG/H_2O(l) < 1ML)^*} - E_{DFT}^{H_2O(l) < 1ML^*} - E_{DFT}^{PEG(g)}^{(undissociated)} - \Delta E_{DFT}^{PEG\_chain^*(interaction)}$$

$$E_{DFT}^{PEG\_chain^*(interaction)} = E_{DFT}^{PEG}^{(dissociated)} - \text{the total number of dissociated PEG}^* \text{ in the unit cell} \times E_{DFT}^{PEG(g)}^{(dissociated)}$$

$$E_{DFT}^{PEG^*(solvation)} = E_{DFT}^{(PEG/H_2O(l) < 1ML)^*} - E_{DFT}^{H_2O(l) < 1ML^*} - E_{DFT}^{PEG^*} + E_{DFT}^*$$

$$\Delta H_{PEG^*} = E_{DFT}^{PEG\_head^*(adsorption)} + E_{DFT}^{PEG\_chain^*(interaction)} + E_{DFT}^{PEG^*(solvation)}$$

$$\frac{E_{DFT}^{PEG\_head^*(adsorption)}}{\# \text{ of PEG}^*} = \frac{E_{DFT}^{PEG\_head^*(adsorption)}}{\text{the total number of PEG}^* \text{ in the unit cell}}$$

$$\frac{E_{DFT}^{PEG\_chain^*(interaction)}}{\# \text{ of monomer}} = \frac{E_{DFT}^{PEG\_chain^*(interaction)}}{\text{the total number of the PEG}^* \text{ monomer in the unit cell}}$$

$$\frac{E_{DFT}^{PEG^*(solvation)}}{\text{the total hydrogen bond number between PEG}^* \text{ and surrounding H}_2\text{O(l) molecules}} = \frac{E_{DFT}^{PEG^*(solvation)}}{E_{DFT}^{PEG^*(solvation)}}$$

$$\frac{E_{DFT}^{PEG^*(solvation)}}{\# \text{ of O in PEG}^*} = \frac{E_{DFT}^{PEG^*(solvation)}}{\text{the total number of the oxygen atom in PEG}^* \text{ in the unit cell}}$$

$$\frac{E_{DFT}^{PEG^*(solvation)}}{\text{the surface coverage of PEG}^* \text{ in the unit cell}} = \frac{E_{DFT}^{PEG^*(solvation)}}{E_{DFT}^{PEG^*(solvation)}}$$

$$\frac{E_{DFT}^{PEG^*(solvation)}}{\text{the surface coverage of H}_2\text{O}^* \text{ in the unit cell}} = \frac{E_{DFT}^{PEG^*(solvation)}}{E_{DFT}^{PEG^*(solvation)}}$$

10) # of O in PEG\* the total number of the oxygen atom in PEG\* in the unit cell

11) the surface coverage of PEG\* in the unit cell

12) the surface coverage of H<sub>2</sub>O\* in the unit cell

13) the total number of desorbed H<sub>2</sub>O/unit cell during PEG adsorption

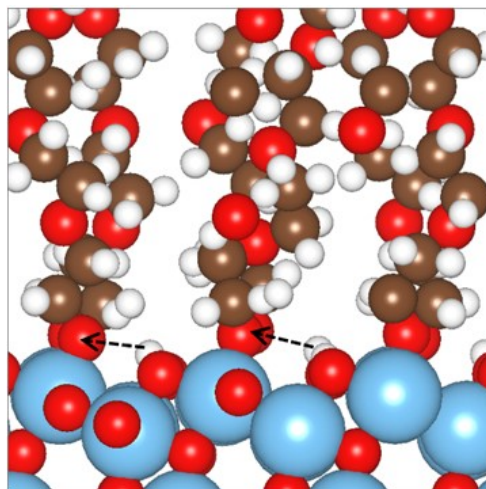

Fig. S4. Molecular configurations of PEG-5\* on TiO<sub>2</sub>(101) at 1.00 ML at 10 ps of AIMD simulation. The H<sub>2</sub>O(l) molecules are deleted for a clarity. The dotted lines with arrows represent hydrogen bonding of the O species of PEG-5\* with surface OH\* of TiO<sub>2</sub>(101).

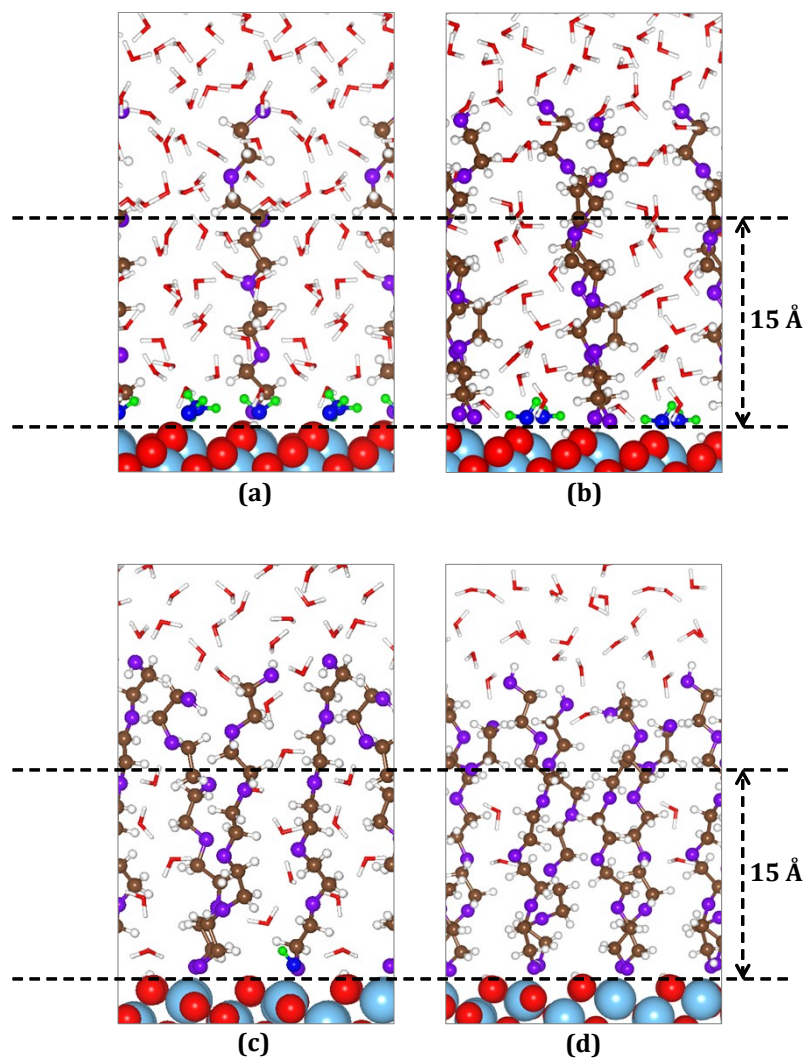

Fig. S5. Side views of the snapshots of  $(PEG-5/H_2O(l) < 1ML)^*$  (10 ps) on TiO<sub>2</sub>(101) where the PEG\* coverage is (a) 0.25, (b) 0.50, (c) 0.75, and (d) 1.00 ML. The dotted lines represent a space up to 15 Å above the surface. Bulk liquid water molecules are described using a simplified form. Light blue, Ti; red, O; blue, O of H<sub>2</sub>O\*; light green, H of H<sub>2</sub>O\*; purple, O of PEG\*; brown, C; white, H.

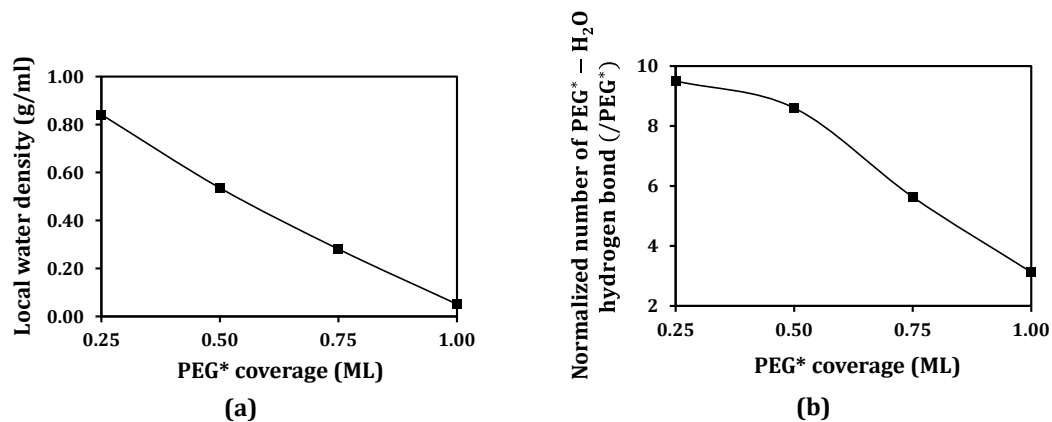

Fig. S6. PEG\* coverage dependent of (a) the local H<sub>2</sub>O density in space up to 15 Å from the surface and (b) normalized number of the PEG\*–H<sub>2</sub>O hydrogen bond.

### Section S5. MD simulation results for PEG-3, PEG-5, PEG-10 and PEG-15 adsorption

Classical MD simulations for PEG-3, PEG-5, PEG-10 and PEG-15 adsorption on TiO<sub>2</sub>(101) surface have been performed. Figs. S7-S9 are representative snapshots showing the brush type adsorption process of each polymer chain. Computed  $T\Delta S_{PEG^*}$  values are summarized in Fig. S10 and Table S7.

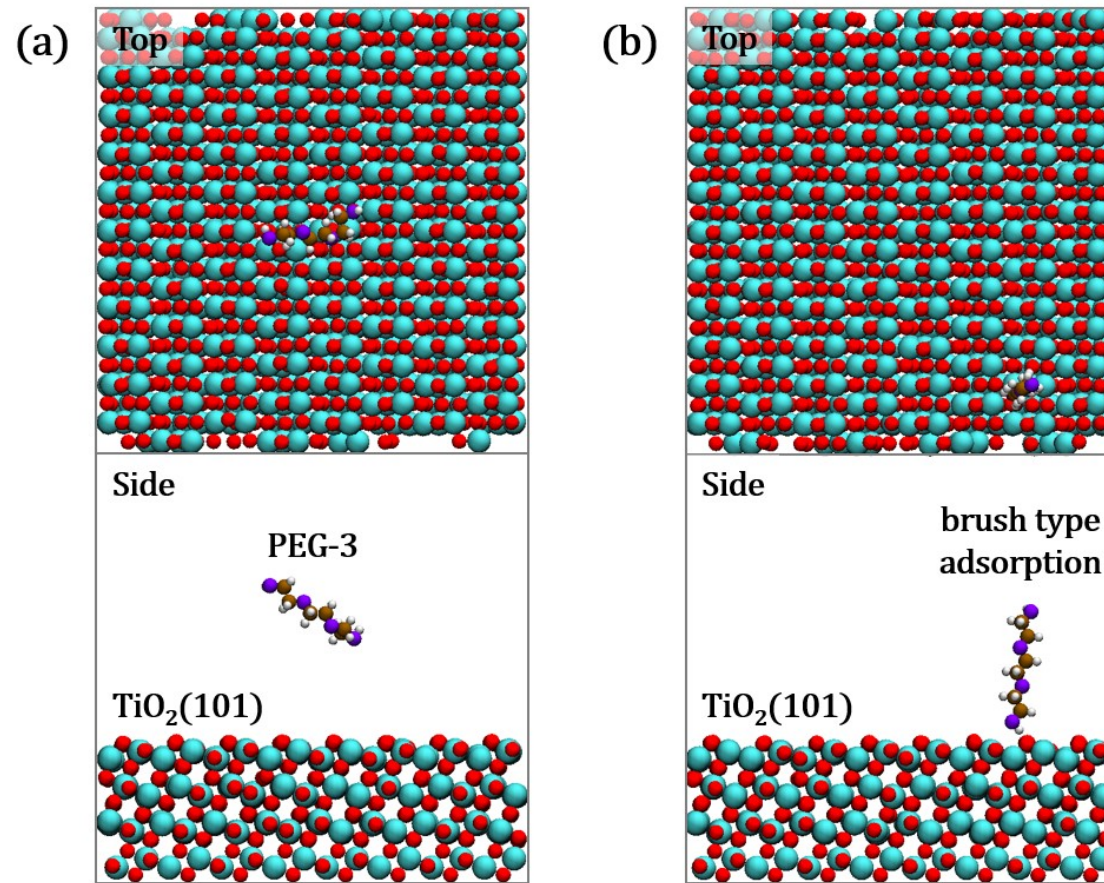

Fig. S7. Top and side views of PEG-3 adsorption on TiO<sub>2</sub>(101) surface. (a) desorbed state and (b) adsorbed state.



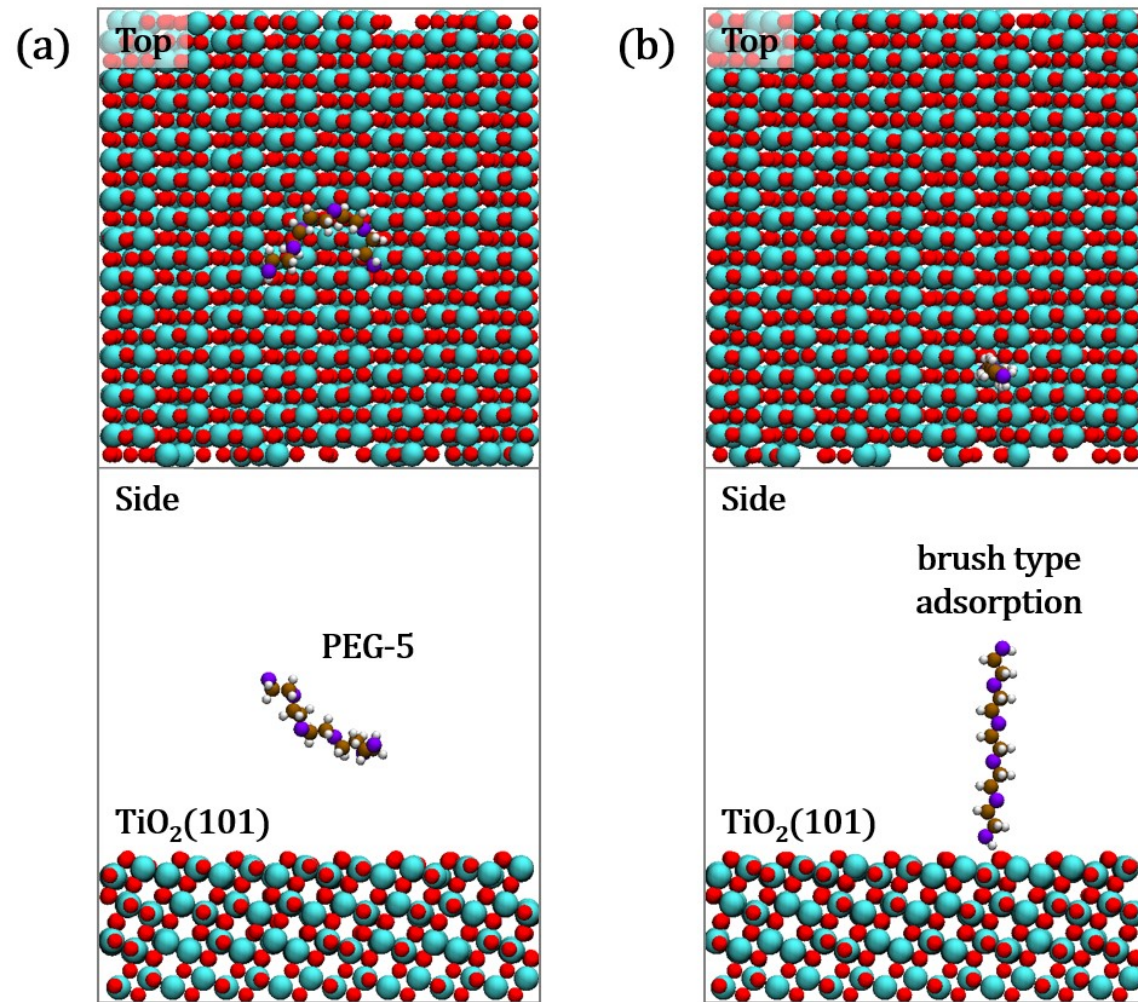

Fig. S8. Top and side views of PEG-5 adsorption on TiO<sub>2</sub>(101) surface. (a) desorbed state and (b) adsorbed state.

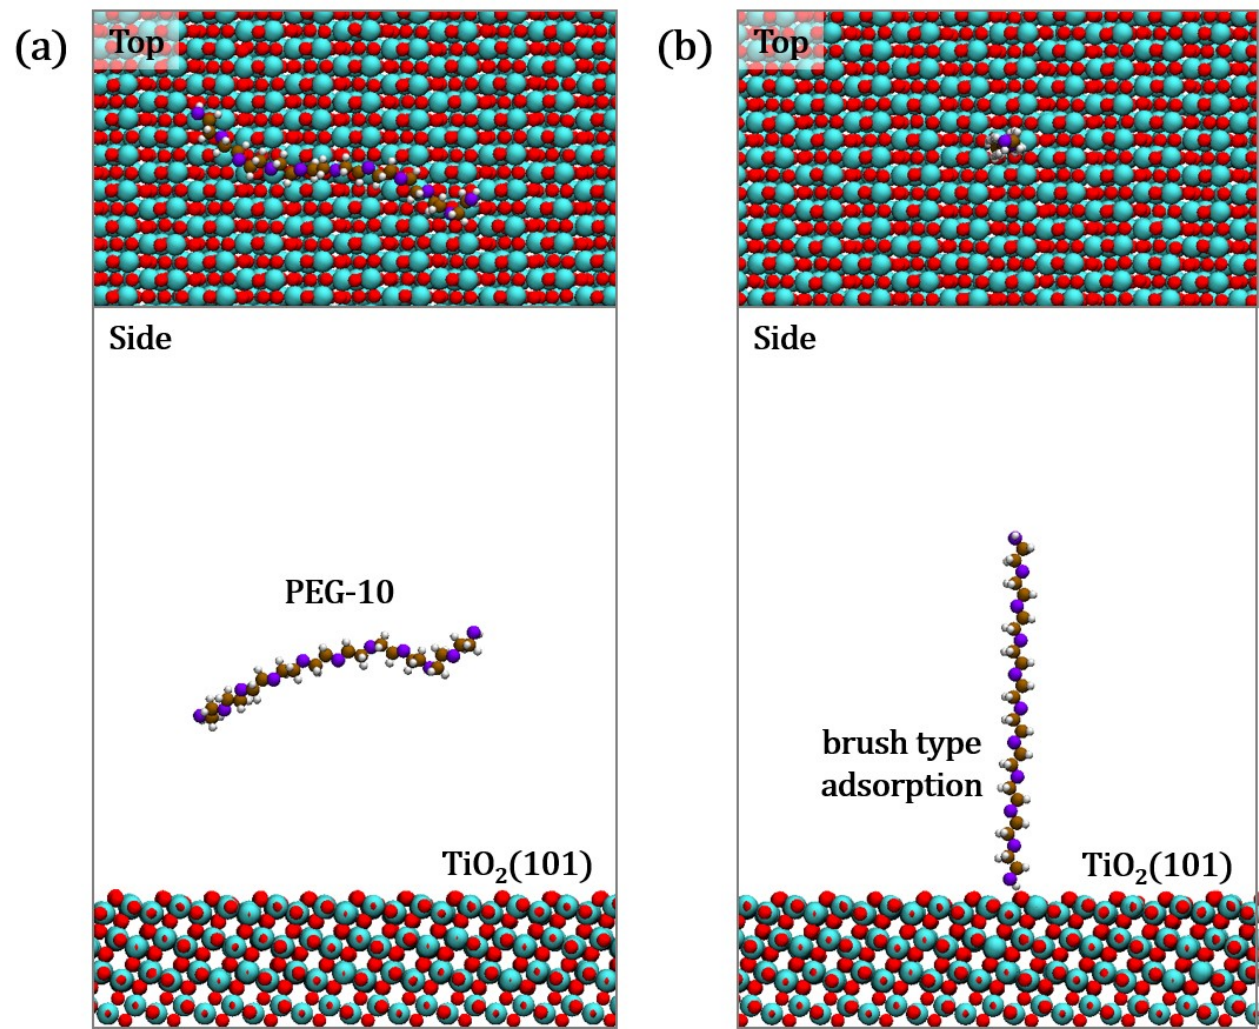

Fig. S9. Top and side views of PEG-10 adsorption on TiO<sub>2</sub>(101) surface. (a) desorbed state and (b) adsorbed state.

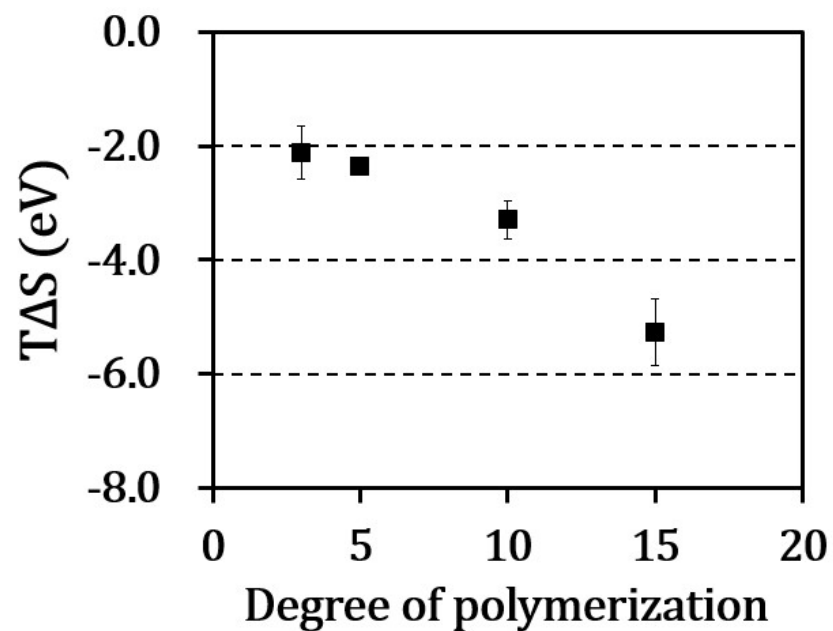

Fig. S10.  $T\Delta S_{PEG^*}$  values of PEG chain of varying degree of polymerization. Error bars corresponding to two standard deviations are drawn.

Table. S7. Estimated average and standard deviation of  $T\Delta S_{PEG^*}$  of PEG chain of varying degree of polymerization

| Degree of polymerization | Average (eV) | Standard deviation (eV) |
|--------------------------|--------------|-------------------------|
| PEG-3                    | -2.12        | 0.24                    |
| PEG-5                    | -2.35        | 0.07                    |
| PEG-10                   | -3.29        | 0.17                    |
| PEG-15                   | -5.28        | 0.29                    |

## Section S6. $\Delta G_{ads}$ for PEG-5\*

Table S8. Data for  $\Delta G_{ads}$  of PEG-5\* on TiO<sub>2</sub>(101)

| Coverage (ML) | $E_{DFT}^{PEG\_head^* (adsorption)}$ (eV) <sup>1)</sup> | $E_{DFT}^{PEG\_chain^* (interaction)}$ (eV) <sup>1)</sup> | $E_{DFT}^{PEG^* (solvation)}$ (eV) <sup>1)</sup> | $\Delta H_{PEG^*}$ (eV) <sup>1)</sup> | $\Delta ZPE_{PEG^*}$ (eV) | $T\Delta S_{PEG^*}$ (eV) <sup>2)</sup> | $N_{1),3)}$ | H <sub>2</sub> O* desorption energy (eV/H <sub>2</sub> O) <sup>4)</sup> | Total H <sub>2</sub> O* desorption energy (eV) <sup>5)</sup> | $\Delta G_{ads}$ (eV) <sup>6)</sup> |
|---------------|---------------------------------------------------------|-----------------------------------------------------------|--------------------------------------------------|---------------------------------------|---------------------------|----------------------------------------|-------------|-------------------------------------------------------------------------|--------------------------------------------------------------|-------------------------------------|
| 0.25          | -1.84                                                   | -0.03                                                     | -5.08                                            | -6.95                                 | 0.17                      |                                        | 1           | 0.08                                                                    | 0.08                                                         | -4.58                               |
| 0.50          | -3.92                                                   | -0.60                                                     | -8.62                                            | -13.14                                | 0.34                      |                                        | 2           | 0.08                                                                    | 0.16                                                         | -8.41                               |
| 0.75          | -6.83                                                   | -2.21                                                     | -8.23                                            | -17.27                                | 0.50                      |                                        | 3           | 0.08                                                                    | 0.24                                                         | -10.18                              |
| 1.00          | -8.36                                                   | -4.37                                                     | -4.22                                            | -16.96                                | 0.67                      |                                        | 4           | 0.08                                                                    | 0.32                                                         | -7.50                               |

$$\Delta H_{PEG^*} = E_{DFT}^{PEG\_head^* (adsorption)} + E_{DFT}^{PEG\_chain^* (interaction)} + E_{DFT}^{PEG^* (solvation)}$$

<sup>1)</sup> the values are from Tables S3-S6 in the SI /

<sup>2)</sup> the values are from Section S4 in the SI.

<sup>3)</sup> the total number of desorbed H<sub>2</sub>O\*/unit cell during PEG adsorption

<sup>4)</sup> the values are from Section S2 in the SI.

<sup>5)</sup> Total H<sub>2</sub>O\* desorption energy =  $n \times$  H<sub>2</sub>O\* desorption energy

<sup>6)</sup>  $\Delta G_{ads} = \Delta H_{PEG^*} + \Delta ZPE_{PEG^*} - \Delta S_{PEG^*} + Total\ H_2O^*\ desorption\ energy$

Table S9. Surface density of PEG-5\* on the TiO<sub>2</sub>(101) surfaces

| PEG-5* coverage (ML) | Density of PEG-5* (/nm <sup>2</sup> ) |
|----------------------|---------------------------------------|
| 0.25                 | 1.28                                  |
| 0.50                 | 2.56                                  |
| 0.75                 | 3.84                                  |
| 1.00                 | 5.12                                  |

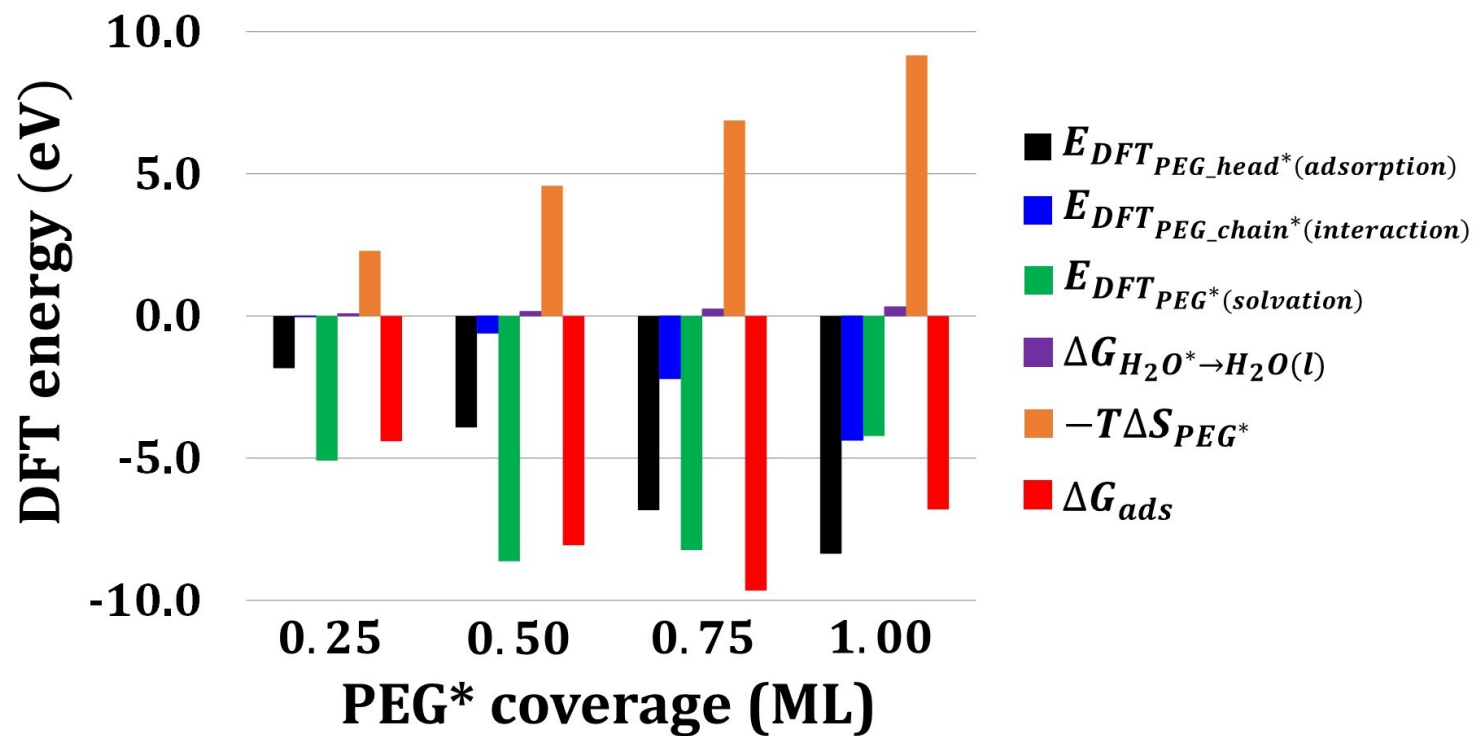

Fig. S11. Histograms for  $E_{DFT}^{PEG\_head^*}(adsorption)$ ,  $E_{DFT}^{PEG\_chain^*}(interaction)$ ,  $E_{DFT}^{PEG^*}(solvation)$ ,  $\Delta G_{H_2O^* \rightarrow H_2O(l)}$ ,  $-T\Delta S_{PEG^*}$ , and  $\Delta G_{ads}$  of PEG-5\* at different coverages.

Section S7. AIMD simulation results for PEG-3\*, PEG-10\*, and PEG-15\*



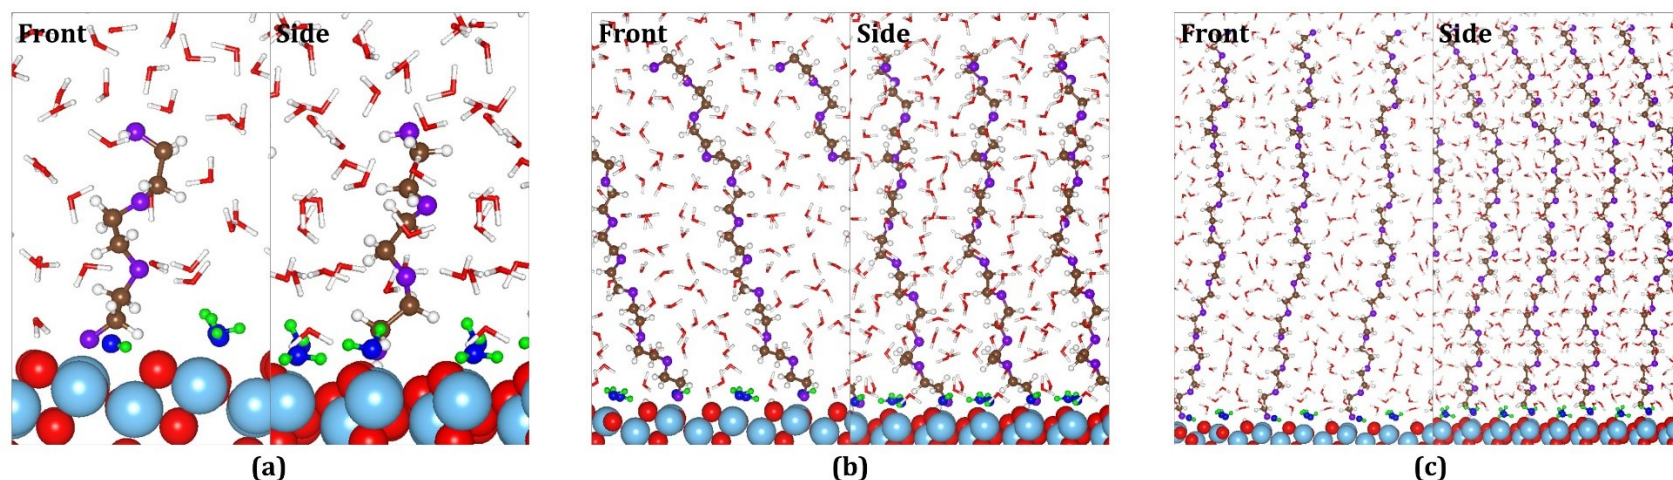

Fig. S12. Front and side views of the snapshots of  $(PEG/H_2O(l) < 1ML)^*$  (10 ps) on  $TiO_2(101)$ . (a) PEG-3\*, (b) PEG-10\*, and (c) PEG-15\*. The bulk liquid water is shown as a simplified. Light blue, Ti; red, O; blue, O of H<sub>2</sub>O\*; light green, H of H<sub>2</sub>O\*; purple, O of PEG\*; brown, C; white, H.

Table S10. Data for 0.25 ML PEG-3\* on  $TiO_2(101)$

| ps      | $E_{DFT}^{(PEG/H_2O(l) < 1ML)}$<br>(eV) | $E_{DFT}^{H_2O(l) < 1ML}$<br>(eV) | $E_{DFT}^{PEG(g)}$<br>(undissociated)<br>(eV) | $E_{DFT}^{PEG^*}$<br>(eV) | $E_{DFT}^*$<br>(slab)<br>(eV) | $E_{DFT}^{PEG}$<br>(dissociated)<br>(eV) <sup>1)</sup> | $E_{DFT}^{PEG(g)}$<br>(dissociated)<br>(eV) <sup>2)</sup> | $E_{DFT}^{PEG\_head^*}$ (adsorption)<br>(eV) <sup>3)</sup> | $E_{DFT}^{PEG\_chain^*}$ (interaction)<br>(eV) <sup>4)</sup> |
|---------|-----------------------------------------|-----------------------------------|-----------------------------------------------|---------------------------|-------------------------------|--------------------------------------------------------|-----------------------------------------------------------|------------------------------------------------------------|--------------------------------------------------------------|
| 1       | -1506.64                                | -1368.36                          | -133.03                                       | -659.28                   | -524.27                       | -127.12                                                | -127.10                                                   | -1.97                                                      | -0.01                                                        |
| 2       | -1506.56                                | -1368.06                          | -133.03                                       | -659.46                   | -524.37                       | -127.10                                                | -127.08                                                   | -2.05                                                      | -0.02                                                        |
| 3       | -1506.53                                | -1368.13                          | -133.03                                       | -659.63                   | -524.29                       | -127.17                                                | -127.14                                                   | -2.29                                                      | -0.02                                                        |
| 4       | -1506.84                                | -1368.48                          | -133.03                                       | -659.80                   | -524.56                       | -127.12                                                | -127.10                                                   | -2.19                                                      | -0.02                                                        |
| 5       | -1507.42                                | -1368.72                          | -133.03                                       | -659.59                   | -524.63                       | -127.08                                                | -127.06                                                   | -1.91                                                      | -0.02                                                        |
| 6       | -1507.38                                | -1369.16                          | -133.03                                       | -659.64                   | -524.36                       | -127.10                                                | -127.11                                                   | -2.25                                                      | 0.01                                                         |
| 7       | -1507.31                                | -1369.07                          | -133.03                                       | -659.34                   | -524.58                       | -126.93                                                | -126.92                                                   | -1.73                                                      | -0.01                                                        |
| 8       | -1507.23                                | -1368.83                          | -133.03                                       | -659.70                   | -524.20                       | -127.11                                                | -127.09                                                   | -2.45                                                      | -0.02                                                        |
| 9       | -1507.27                                | -1368.97                          | -133.03                                       | -659.54                   | -524.49                       | -127.06                                                | -127.05                                                   | -2.01                                                      | -0.02                                                        |
| 10      | -1507.18                                | -1368.85                          | -133.03                                       | -659.63                   | -524.54                       | -127.06                                                | -126.95                                                   | -1.96                                                      | -0.10                                                        |
| Average | -1507.04                                | -1368.66                          | -133.03                                       | -659.56                   | -524.43                       | -127.08                                                | -127.06                                                   | -2.08 ± 0.20                                               | -0.02 ± 0.03                                                 |

Table S10. continued

| ps | $E_{DFT}^{PEG^*}$ (solvation)<br>(eV) <sup>5)</sup> | $\Delta H_{PEG^*}$<br>(eV) <sup>6)</sup> | $E_{DFT}^{PEG\_head^*}$ (adsorption)<br>/# of PEG<br>(eV/PEG) <sup>7)</sup> | $E_{DFT}^{PEG\_chain^*}$ (interaction)<br>/# of monomer<br>(eV/monomer) <sup>8)</sup> | $\#_{H-bond}$ <sup>9)</sup> | $E_{DFT}^{PEG^*}$ (solvation)<br>/# of O in PEG*<br>(eV/monomer) <sup>10)</sup> | $\theta_{PEG^*}$<br>(ML) <sup>11)</sup> | $\theta_{H_2O^*}$<br>(ML) <sup>12)</sup> | $N^{13)}$ |
|----|-----------------------------------------------------|------------------------------------------|-----------------------------------------------------------------------------|---------------------------------------------------------------------------------------|-----------------------------|---------------------------------------------------------------------------------|-----------------------------------------|------------------------------------------|-----------|
|----|-----------------------------------------------------|------------------------------------------|-----------------------------------------------------------------------------|---------------------------------------------------------------------------------------|-----------------------------|---------------------------------------------------------------------------------|-----------------------------------------|------------------------------------------|-----------|

|         |              |              |       |       |      |       |      |      |      |
|---------|--------------|--------------|-------|-------|------|-------|------|------|------|
| 1       | -3.28        | -5.26        | -1.97 | 0.00  | 6    | -0.82 | 0.25 | 0.75 | 1    |
| 2       | -3.40        | -5.47        | -2.05 | -0.01 | 7    | -0.85 | 0.25 | 0.75 | 1    |
| 3       | -3.05        | -5.37        | -2.29 | -0.01 | 5    | -0.76 | 0.25 | 0.75 | 1    |
| 4       | -3.12        | -5.33        | -2.19 | -0.01 | 5    | -0.78 | 0.25 | 0.75 | 1    |
| 5       | -3.74        | -5.67        | -1.91 | -0.01 | 7    | -0.94 | 0.25 | 0.75 | 1    |
| 6       | -2.95        | -5.19        | -2.25 | 0.00  | 5    | -0.74 | 0.25 | 0.75 | 1    |
| 7       | -3.47        | -5.21        | -1.73 | 0.00  | 6    | -0.87 | 0.25 | 0.75 | 1    |
| 8       | -2.90        | -5.37        | -2.45 | -0.01 | 5    | -0.73 | 0.25 | 0.75 | 1    |
| 9       | -3.25        | -5.27        | -2.01 | -0.01 | 6    | -0.81 | 0.25 | 0.75 | 1    |
| 10      | -3.24        | -5.30        | -1.96 | -0.03 | 6    | -0.81 | 0.25 | 0.75 | 1    |
| Average | -3.24 ± 0.24 | -5.34 ± 0.13 | -2.08 | -0.01 | 5.80 | -0.81 | 0.25 | 0.75 | 1.00 |

- 1) Single point calculation for dissociated PEG where the structure and unit cell are from  $E_{DFT}^{(PEG/H_2O(l) < 1ML)^*}$
- 2) Single point calculation for dissociated PEG where the structure is from  $E_{DFT}^{(PEG/H_2O(l) < 1ML)^*}$  in a large unit cell (no interactions between PEG)
- 3)  $E_{DFT}^{PEG\_head^* (adsorption)} = E_{DFT}^{(PEG/H_2O(l) < 1ML)^*} - E_{DFT}^{H_2O(l) < 1ML^*} - E_{DFT}^{PEG(g) (undissociated)} - \Delta E_{DFT}^{PEG\_chain^* (interaction)}$
- 4)  $E_{DFT}^{PEG\_chain^* (interaction)} = E_{DFT}^{PEG (dissociated)} - \text{the total number of dissociated PEG}^* \text{ in the unit cell} \times E_{DFT}^{PEG(g) (dissociated)}$
- 5)  $E_{DFT}^{PEG^* (solvation)} = E_{DFT}^{(PEG/H_2O(l) < 1ML)^*} - E_{DFT}^{H_2O(l) < 1ML^*} - E_{DFT}^{PEG^*} + E_{DFT}^*$
- 6)  $\Delta H_{PEG^*} = E_{DFT}^{PEG\_head^* (adsorption)} + E_{DFT}^{PEG\_chain^* (interaction)} + E_{DFT}^{PEG^* (solvation)}$
- 7)  $\frac{E_{DFT}^{PEG\_head^* (adsorption)}}{\# \text{ of PEG}^*} = \frac{E_{DFT}^{PEG\_head^* (adsorption)}}{\text{the total number of PEG}^* \text{ in the unit cell}}$
- 8)  $\frac{E_{DFT}^{PEG\_chain^* (interaction)}}{\# \text{ of monomer}} = \frac{E_{DFT}^{PEG\_chain^* (interaction)}}{\text{the total number of the PEG}^* \text{ monomer in the unit cell}}$
- 9) the total hydrogen bond number between PEG\* and surrounding H<sub>2</sub>O(l) molecules
- 10)  $\frac{E_{DFT}^{PEG^* (solvation)}}{\# \text{ of O in PEG}^*} = \frac{E_{DFT}^{PEG^* (solvation)}}{\text{the total number of the oxygen atom in PEG}^* \text{ in the unit cell}}$
- 11) the surface coverage of PEG\* in the unit cell
- 12) the surface coverage of H<sub>2</sub>O\* in the unit cell
- 13) the total number of desorbed H<sub>2</sub>O/unit cell during PEG adsorption

Table S11. Data for 0.25 ML PEG-10\* on TiO<sub>2</sub>(101)

| ps      | $E_{DFT}^{(PEG/H_2O(l) < 1ML)}$<br>(eV) | $E_{DFT}^{H_2O(l) < 1ML}$<br>(eV) | $E_{DFT}^{PEG(g)}$<br>(undissociated)<br>(eV) | $E_{DFT}^{PEG^*}$<br>(eV) | $E_{DFT}^*$<br>(slab)<br>(eV) | $E_{DFT}^{PEG}$<br>(dissociated)<br>(eV) <sup>1)</sup> | $E_{DFT}^{PEG(g)}$<br>(dissociated)<br>(eV) <sup>2)</sup> | $E_{DFT}^{PEG\_head^* (adsorption)}$<br>(eV) <sup>3)</sup> | $E_{DFT}^{PEG\_chain^* (interaction)}$<br>(eV) <sup>4)</sup> |
|---------|-----------------------------------------|-----------------------------------|-----------------------------------------------|---------------------------|-------------------------------|--------------------------------------------------------|-----------------------------------------------------------|------------------------------------------------------------|--------------------------------------------------------------|
| 1       | -2463.75                                | -2042.25                          | -410.45                                       | -937.18                   | -524.36                       | -404.76                                                | -404.66                                                   | -2.27                                                      | -0.10                                                        |
| 2       | -2463.76                                | -2042.59                          | -410.45                                       | -937.44                   | -524.61                       | -404.85                                                | -404.76                                                   | -2.30                                                      | -0.09                                                        |
| 3       | -2465.23                                | -2043.20                          | -410.45                                       | -937.41                   | -524.81                       | -404.79                                                | -404.64                                                   | -2.00                                                      | -0.15                                                        |
| 4       | -2465.23                                | -2041.91                          | -410.45                                       | -937.44                   | -524.83                       | -404.85                                                | -404.66                                                   | -1.96                                                      | -0.20                                                        |
| 5       | -2465.14                                | -2042.94                          | -410.45                                       | -937.26                   | -524.65                       | -404.74                                                | -404.63                                                   | -2.05                                                      | -0.11                                                        |
| 6       | -2465.09                                | -2043.09                          | -410.45                                       | -937.31                   | -524.77                       | -404.74                                                | -404.62                                                   | -1.98                                                      | -0.11                                                        |
| 7       | -2464.50                                | -2042.28                          | -410.45                                       | -937.28                   | -524.75                       | -404.71                                                | -404.62                                                   | -2.00                                                      | -0.09                                                        |
| 8       | -2465.32                                | -2043.81                          | -410.45                                       | -937.23                   | -524.61                       | -404.75                                                | -404.65                                                   | -2.07                                                      | -0.10                                                        |
| 9       | -2465.81                                | -2044.26                          | -410.45                                       | -937.21                   | -524.66                       | -404.74                                                | -404.62                                                   | -1.99                                                      | -0.12                                                        |
| 10      | -2465.26                                | -2043.70                          | -410.45                                       | -937.43                   | -524.81                       | -404.79                                                | -404.67                                                   | -2.05                                                      | -0.12                                                        |
| Average | -2464.91                                | -2043.00                          | -410.45                                       | -937.32                   | -524.69                       | -404.77                                                | -404.65                                                   | -2.07 ± 0.11                                               | -0.12 ± 0.03                                                 |

Table S11. continued

| ps      | $E_{DFT}^{PEG^* (solvation)}$<br>(eV) <sup>5)</sup> | $\Delta H_{PEG^*}$<br>(eV) <sup>6)</sup> | $E_{DFT}^{PEG\_head^* (adsorption)}$<br>/# of PEG<br>(eV/PEG) <sup>7)</sup> | $E_{DFT}^{PEG\_chain^* (interaction)}$<br>/# of monomer<br>(eV/monomer) <sup>8)</sup> | # <sub>H - bond</sub> <sup>9)</sup> | $E_{DFT}^{PEG^* (solvation)}$<br>/# of O in PEG*<br>(eV/monomer) <sup>10)</sup> | $\theta_{PEG^*}$<br>(ML) <sup>11)</sup> | $\theta_{H_2O^*}$<br>(ML) <sup>12)</sup> | $N^{13)}$ |
|---------|-----------------------------------------------------|------------------------------------------|-----------------------------------------------------------------------------|---------------------------------------------------------------------------------------|-------------------------------------|---------------------------------------------------------------------------------|-----------------------------------------|------------------------------------------|-----------|
| 1       | -8.68                                               | -11.05                                   | -2.27                                                                       | -0.01                                                                                 | 15                                  | -0.79                                                                           | 0.25                                    | 0.75                                     | 1         |
| 2       | -8.33                                               | -10.72                                   | -2.30                                                                       | -0.01                                                                                 | 16                                  | -0.76                                                                           | 0.25                                    | 0.75                                     | 1         |
| 3       | -9.43                                               | -11.59                                   | -2.00                                                                       | -0.02                                                                                 | 15                                  | -0.86                                                                           | 0.25                                    | 0.75                                     | 1         |
| 4       | -10.71                                              | -12.87                                   | -1.96                                                                       | -0.02                                                                                 | 16                                  | -0.97                                                                           | 0.25                                    | 0.75                                     | 1         |
| 5       | -9.58                                               | -11.75                                   | -2.05                                                                       | -0.01                                                                                 | 15                                  | -0.87                                                                           | 0.25                                    | 0.75                                     | 1         |
| 6       | -9.45                                               | -11.55                                   | -1.98                                                                       | -0.01                                                                                 | 15                                  | -0.86                                                                           | 0.25                                    | 0.75                                     | 1         |
| 7       | -9.67                                               | -11.77                                   | -2.00                                                                       | -0.01                                                                                 | 14                                  | -0.88                                                                           | 0.25                                    | 0.75                                     | 1         |
| 8       | -8.89                                               | -11.06                                   | -2.07                                                                       | -0.01                                                                                 | 12                                  | -0.81                                                                           | 0.25                                    | 0.75                                     | 1         |
| 9       | -9.00                                               | -11.10                                   | -1.99                                                                       | -0.01                                                                                 | 13                                  | -0.82                                                                           | 0.25                                    | 0.75                                     | 1         |
| 10      | -8.94                                               | -11.11                                   | -2.05                                                                       | -0.01                                                                                 | 13                                  | -0.81                                                                           | 0.25                                    | 0.75                                     | 1         |
| Average | -9.27 ± 0.63                                        | -11.46 ± 0.58                            | -2.07                                                                       | -0.01                                                                                 | 14.40                               | -0.84                                                                           | 0.25                                    | 0.75                                     | 1.00      |

1) Single point calculation for dissociated PEG where the structure and unit cell are from  $E_{DFT}^{(PEG/H_2O(l) < 1ML)^*}$

2) Single point calculation for dissociated PEG where the structure is from  $E_{DFT}^{(PEG/H_2O(l) < 1ML)^*}$  in a large unit cell (no interactions between PEG)

$$E_{DFT}^{PEG\_head^* (adsorption)} = E_{DFT}^{(PEG/H_2O(l) < 1ML)^*} - E_{DFT}^{H_2O(l) < 1ML} - E_{DFT}^{PEG(g) (undissociated)} - \Delta E_{DFT}^{PEG\_chain^* (interaction)}$$

$$E_{DFT}^{PEG\_chain^* (interaction)} = E_{DFT}^{PEG (dissociated)} - \text{the total number of dissociated PEG}^* \text{ in the unit cell} \times E_{DFT}^{PEG(g) (dissociated)}$$

$$E_{DFT}^{PEG^* (solvation)} = E_{DFT}^{(PEG/H_2O(l) < 1ML)^*} - E_{DFT}^{H_2O(l) < 1ML} - E_{DFT}^{PEG^*} + E_{DFT}^*$$

$$\Delta H_{PEG^*} = E_{DFT}^{PEG\_head^* (adsorption)} + E_{DFT}^{PEG\_chain^* (interaction)} + E_{DFT}^{PEG^* (solvation)}$$



- $$\frac{E_{DFT}^{PEG_{head}^* (adsorption)}}{\# \text{ of } PEG^*} = \frac{E_{DFT}^{PEG_{head}^* (adsorption)}}{\text{the total number of } PEG^* \text{ in the unit cell}}$$
- $$\frac{E_{DFT}^{PEG_{chain}^* (interaction)}}{\# \text{ of monomer}} = \frac{E_{DFT}^{PEG_{chain}^* (interaction)}}{\text{the total number of the } PEG^* \text{ monomer in the unit cell}}$$
- $$\frac{E_{DFT}^{PEG^* (solvation)}}{\# \text{ of O in } PEG^*} = \frac{E_{DFT}^{PEG^* (solvation)}}{\text{the total number of the oxygen atom in } PEG^* \text{ in the unit cell}}$$
- 7) # of PEG\* the total number of PEG\* in the unit cell
- 8) # of monomer the total number of the PEG\* monomer in the unit cell
- 9) the total hydrogen bond number between PEG\* and surrounding H<sub>2</sub>O(l) molecules
- 10) # of O in PEG\* the total number of the oxygen atom in PEG\* in the unit cell
- 11) the surface coverage of PEG\* in the unit cell
- 12) the surface coverage of H<sub>2</sub>O\* in the unit cell
- 13) the total number of desorbed H<sub>2</sub>O/unit cell during PEG adsorption

Table S12. Data for 0.25 ML PEG-15\* on TiO<sub>2</sub>(101)

| ps      | $E_{DFT}^{PEG/H_2O(l) < 1ML}$<br>(eV) | $E_{DFT}^{H_2O(l) < 1ML^*}$<br>(eV) | $E_{DFT}^{PEG(g)}$<br>(undissociated)<br>(eV) | $E_{DFT}^{PEG^*}$<br>(eV) | $E_{DFT}^*$<br>(slab)<br>(eV) | $E_{DFT}^{PEG}$<br>(dissociated)<br>(eV) <sup>1)</sup> | $E_{DFT}^{PEG(g)}$<br>(dissociated)<br>(eV) <sup>2)</sup> | $E_{DFT}^{PEG_{head}^* (adsorption)}$<br>(eV) <sup>3)</sup> | $E_{DFT}^{PEG_{chain}^* (interaction)}$<br>(eV) <sup>4)</sup> |
|---------|---------------------------------------|-------------------------------------|-----------------------------------------------|---------------------------|-------------------------------|--------------------------------------------------------|-----------------------------------------------------------|-------------------------------------------------------------|---------------------------------------------------------------|
| 1       | -3088.16                              | -2464.39                            | -608.68                                       | -1135.29                  | -524.68                       | -602.57                                                | -602.41                                                   | -1.77                                                       | -0.16                                                         |
| 2       | -3090.94                              | -2468.54                            | -608.68                                       | -1135.15                  | -524.71                       | -602.53                                                | -602.42                                                   | -1.64                                                       | -0.12                                                         |
| 3       | -3090.71                              | -2467.12                            | -608.68                                       | -1135.77                  | -524.86                       | -602.95                                                | -602.82                                                   | -2.09                                                       | -0.14                                                         |
| 4       | -3091.52                              | -2468.84                            | -608.68                                       | -1135.64                  | -524.69                       | -602.85                                                | -602.73                                                   | -2.15                                                       | -0.12                                                         |
| 5       | -3090.95                              | -2467.75                            | -608.68                                       | -1135.70                  | -524.49                       | -603.15                                                | -602.99                                                   | -2.37                                                       | -0.17                                                         |
| 6       | -3090.80                              | -2468.01                            | -608.68                                       | -1135.67                  | -524.78                       | -602.99                                                | -602.76                                                   | -1.97                                                       | -0.23                                                         |
| 7       | -3092.03                              | -2469.03                            | -608.68                                       | -1135.75                  | -524.87                       | -603.07                                                | -602.96                                                   | -2.09                                                       | -0.11                                                         |
| 8       | -3092.21                              | -2469.39                            | -608.68                                       | -1135.95                  | -524.91                       | -603.21                                                | -603.06                                                   | -2.21                                                       | -0.15                                                         |
| 9       | -3091.44                              | -2468.11                            | -608.68                                       | -1135.67                  | -524.59                       | -603.03                                                | -602.90                                                   | -2.26                                                       | -0.14                                                         |
| 10      | -3090.82                              | -2468.24                            | -608.68                                       | -1135.71                  | -524.93                       | -602.97                                                | -602.84                                                   | -1.97                                                       | -0.13                                                         |
| Average | -3090.96                              | -2467.94                            | -608.68                                       | -1135.63                  | -524.75                       | -602.93                                                | -602.79                                                   | -2.05 ± 0.21                                                | -0.15 ± 0.03                                                  |

Table S12. continued

| ps | $E_{DFT}^{PEG^* (solvation)}$<br>(eV) <sup>5)</sup> | $\Delta H_{PEG^*}$<br>(eV) <sup>6)</sup> | $E_{DFT}^{PEG_{head}^* (adsorption)}$<br>/# of PEG<br>(eV/PEG) <sup>7)</sup> | $E_{DFT}^{PEG_{chain}^* (interaction)}$<br>/# of monomer<br>(eV/monomer) <sup>8)</sup> | # <sub>H-bond</sub> <sup>9)</sup> | $E_{DFT}^{PEG^* (solvation)}$<br>/# of O in PEG*<br>(eV/monomer) <sup>10)</sup> | $\theta_{PEG^*}$<br>(ML) <sup>11)</sup> | $\theta_{H_2O^*}$<br>(ML) <sup>12)</sup> | $N^{13)}$ |
|----|-----------------------------------------------------|------------------------------------------|------------------------------------------------------------------------------|----------------------------------------------------------------------------------------|-----------------------------------|---------------------------------------------------------------------------------|-----------------------------------------|------------------------------------------|-----------|
| 1  | -13.17                                              | -15.10                                   | -1.77                                                                        | -0.01                                                                                  | 21                                | -0.82                                                                           | 0.25                                    | 0.75                                     | 1         |
| 2  | -11.97                                              | -13.72                                   | -1.64                                                                        | -0.01                                                                                  | 19                                | -0.75                                                                           | 0.25                                    | 0.75                                     | 1         |
| 3  | -12.68                                              | -14.91                                   | -2.09                                                                        | -0.01                                                                                  | 22                                | -0.79                                                                           | 0.25                                    | 0.75                                     | 1         |
| 4  | -11.74                                              | -14.01                                   | -2.15                                                                        | -0.01                                                                                  | 18                                | -0.73                                                                           | 0.25                                    | 0.75                                     | 1         |
| 5  | -11.99                                              | -14.52                                   | -2.37                                                                        | -0.01                                                                                  | 18                                | -0.75                                                                           | 0.25                                    | 0.75                                     | 1         |
| 6  | -11.91                                              | -14.11                                   | -1.97                                                                        | -0.02                                                                                  | 18                                | -0.74                                                                           | 0.25                                    | 0.75                                     | 1         |
| 7  | -12.12                                              | -14.32                                   | -2.09                                                                        | -0.01                                                                                  | 17                                | -0.76                                                                           | 0.25                                    | 0.75                                     | 1         |

|         |               |               |       |       |       |       |      |      |      |
|---------|---------------|---------------|-------|-------|-------|-------|------|------|------|
| 8       | -11.77        | -14.14        | -2.21 | -0.01 | 18    | -0.74 | 0.25 | 0.75 | 1    |
| 9       | -12.25        | -14.65        | -2.26 | -0.01 | 21    | -0.77 | 0.25 | 0.75 | 1    |
| 10      | -11.80        | -13.90        | -1.97 | -0.01 | 16    | -0.74 | 0.25 | 0.75 | 1    |
| Average | -12.14 ± 0.43 | -14.34 ± 0.42 | -2.05 | -0.01 | 18.80 | -0.76 | 0.25 | 0.75 | 1.00 |

- 1) Single point calculation for dissociated PEG where the structure and unit cell are from  $E_{DFT}^{(PEG/H_2O(l) < 1ML)^*}$
- 2) Single point calculation for dissociated PEG where the structure is from  $E_{DFT}^{(PEG/H_2O(l) < 1ML)^*}$  in a large unit cell (no interactions between PEG)
- 3)  $E_{DFT}^{PEG\_head^* (adsorption)} = E_{DFT}^{(PEG/H_2O(l) < 1ML)^*} - E_{DFT}^{H_2O(l) < 1ML} - E_{DFT}^{PEG(g) (undissociated)} - \Delta E_{DFT}^{PEG\_chain^* (interaction)}$
- 4)  $E_{DFT}^{PEG\_chain^* (interaction)} = E_{DFT}^{PEG} (dissociated) - \text{the total number of dissociated PEG}^* \text{ in the unit cell} \times E_{DFT}^{PEG(g) (dissociated)}$
- 5)  $E_{DFT}^{PEG^* (solvation)} = E_{DFT}^{(PEG/H_2O(l) < 1ML)^*} - E_{DFT}^{H_2O(l) < 1ML} - E_{DFT}^{PEG^*} + E_{DFT}^*$
- 6)  $\Delta H_{PEG^*} = E_{DFT}^{PEG\_head^* (adsorption)} + E_{DFT}^{PEG\_chain^* (interaction)} + E_{DFT}^{PEG^* (solvation)}$
- 7)  $\frac{E_{DFT}^{PEG\_head^* (adsorption)}}{\# \text{ of PEG}^*} = \frac{E_{DFT}^{PEG\_head^* (adsorption)}}{\text{the total number of PEG}^* \text{ in the unit cell}}$
- 8)  $\frac{E_{DFT}^{PEG\_chain^* (interaction)}}{\# \text{ of monomer}} = \frac{E_{DFT}^{PEG\_chain^* (interaction)}}{\text{the total number of the PEG}^* \text{ monomer in the unit cell}}$
- 9) the total hydrogen bond number between PEG\* and surrounding H<sub>2</sub>O(l) molecules
- 10)  $\frac{E_{DFT}^{PEG^* (solvation)}}{\# \text{ of O in PEG}^*} = \frac{E_{DFT}^{PEG^* (solvation)}}{\text{the total number of the oxygen atom in PEG}^* \text{ in the unit cell}}$
- 11) the surface coverage of PEG\* in the unit cell
- 12) the surface coverage of H<sub>2</sub>O\* in the unit cell
- 13) the total number of desorbed H<sub>2</sub>O/unit cell during PEG adsorption

## Section S8. $\Delta G_{ads}$ for PEG-3\*, PEG-5\*, PEG-10\*, and PEG-15\*

Table S13. Data for  $\Delta G_{ads}$  of PEG-3\* on TiO<sub>2</sub>(101)

| Coverage (ML) | # of PEG* (#/unit cell) | # of PEG* monomer (#/unit cell) | # of oxygen atom in PEG* (#/unit cell) | $E_{DFT}^{PEG\_head^* (adsorption)}$ (eV) | $E_{DFT}^{PEG\_chain^* (interaction)}$ (eV) | $E_{DFT}^{PEG^* (solvation)}$ (eV) | $\Delta H_{PEG^*}$ (eV) | $\Delta ZPE_{PEG^*}$ (eV) | $T\Delta S_{PEG^*}$ (eV) |
|---------------|-------------------------|---------------------------------|----------------------------------------|-------------------------------------------|---------------------------------------------|------------------------------------|-------------------------|---------------------------|--------------------------|
| 0.05          | 0.20                    | 0.60                            | 0.80                                   | -0.52                                     | -0.02                                       | -0.62                              | -1.16                   | 0.00                      | -0.50                    |

|      |      |       |       |       |       |       |        |       |        |
|------|------|-------|-------|-------|-------|-------|--------|-------|--------|
| 0.10 | 0.40 | 1.20  | 1.60  | -0.94 | -0.02 | -1.30 | -2.27  | -0.01 | -1.00  |
| 0.15 | 0.60 | 1.80  | 2.40  | -1.29 | -0.02 | -2.01 | -3.32  | -0.01 | -1.50  |
| 0.20 | 0.80 | 2.40  | 3.20  | -1.61 | -0.02 | -2.71 | -4.34  | -0.01 | -2.00  |
| 0.25 | 1.00 | 3.00  | 4.00  | -1.92 | -0.03 | -3.39 | -5.34  | -0.02 | -2.51  |
| 0.30 | 1.20 | 3.60  | 4.80  | -2.24 | -0.05 | -4.02 | -6.31  | -0.02 | -3.01  |
| 0.35 | 1.40 | 4.20  | 5.60  | -2.59 | -0.09 | -4.58 | -7.27  | -0.02 | -3.51  |
| 0.40 | 1.60 | 4.80  | 6.40  | -2.98 | -0.16 | -5.07 | -8.21  | -0.03 | -4.01  |
| 0.45 | 1.80 | 5.40  | 7.20  | -3.43 | -0.25 | -5.46 | -9.13  | -0.03 | -4.51  |
| 0.50 | 2.00 | 6.00  | 8.00  | -3.92 | -0.36 | -5.75 | -10.03 | -0.03 | -5.01  |
| 0.55 | 2.20 | 6.60  | 8.80  | -4.46 | -0.50 | -5.92 | -10.88 | -0.04 | -5.51  |
| 0.60 | 2.40 | 7.20  | 9.60  | -5.03 | -0.67 | -5.99 | -11.69 | -0.04 | -6.01  |
| 0.65 | 2.60 | 7.80  | 10.40 | -5.63 | -0.87 | -5.93 | -12.43 | -0.04 | -6.52  |
| 0.70 | 2.80 | 8.40  | 11.20 | -6.24 | -1.09 | -5.77 | -13.09 | -0.04 | -7.02  |
| 0.75 | 3.00 | 9.00  | 12.00 | -6.83 | -1.32 | -5.49 | -13.64 | -0.05 | -7.52  |
| 0.80 | 3.20 | 9.60  | 12.80 | -7.37 | -1.58 | -5.11 | -14.06 | -0.05 | -8.02  |
| 0.85 | 3.40 | 10.20 | 13.60 | -7.84 | -1.84 | -4.64 | -14.32 | -0.05 | -8.52  |
| 0.90 | 3.60 | 10.80 | 14.40 | -8.19 | -2.11 | -4.09 | -14.38 | -0.06 | -9.02  |
| 0.95 | 3.80 | 11.40 | 15.20 | -8.38 | -2.37 | -3.47 | -14.22 | -0.06 | -9.52  |
| 1.00 | 4.00 | 12.00 | 16.00 | -8.36 | -2.62 | -2.81 | -13.80 | -0.06 | -10.02 |

Table S13. continued

| Coverage (ML) | $N$  | H <sub>2</sub> O* desorption energy (eV/H <sub>2</sub> O) | Total H <sub>2</sub> O* desorption energy (eV) | $\Delta G_{ads}$ (eV) |
|---------------|------|-----------------------------------------------------------|------------------------------------------------|-----------------------|
| 0.05          | 0.20 | 0.08                                                      | 0.02                                           | -0.65                 |
| 0.10          | 0.40 | 0.08                                                      | 0.03                                           | -1.24                 |
| 0.15          | 0.60 | 0.08                                                      | 0.05                                           | -1.78                 |
| 0.20          | 0.80 | 0.08                                                      | 0.06                                           | -2.29                 |
| 0.25          | 1.00 | 0.08                                                      | 0.08                                           | -2.77                 |
| 0.30          | 1.20 | 0.08                                                      | 0.10                                           | -3.23                 |
| 0.35          | 1.40 | 0.08                                                      | 0.11                                           | -3.67                 |
| 0.40          | 1.60 | 0.08                                                      | 0.13                                           | -4.10                 |
| 0.45          | 1.80 | 0.08                                                      | 0.14                                           | -4.51                 |
| 0.50          | 2.00 | 0.08                                                      | 0.16                                           | -4.89                 |
| 0.55          | 2.20 | 0.08                                                      | 0.18                                           | -5.23                 |
| 0.60          | 2.40 | 0.08                                                      | 0.19                                           | -5.52                 |
| 0.65          | 2.60 | 0.08                                                      | 0.21                                           | -5.75                 |
| 0.70          | 2.80 | 0.08                                                      | 0.22                                           | -5.89                 |
| 0.75          | 3.00 | 0.08                                                      | 0.24                                           | -5.93                 |
| 0.80          | 3.20 | 0.08                                                      | 0.26                                           | -5.83                 |
| 0.85          | 3.40 | 0.08                                                      | 0.27                                           | -5.58                 |
| 0.90          | 3.60 | 0.08                                                      | 0.29                                           | -5.13                 |
| 0.95          | 3.80 | 0.08                                                      | 0.30                                           | -4.46                 |
| 1.00          | 4.00 | 0.08                                                      | 0.32                                           | -3.52                 |

Table S14. Data for  $\Delta G_{ads}$  of PEG-5\* on TiO<sub>2</sub>(101)

| Coverage (ML) | # of PEG* (#/unit cell) | # of PEG* monomer (#/unit cell) | # of oxygen atom in PEG* (#/unit cell) | $E_{DFT}^{PEG\_head*}$ (adsorption) (eV) | $E_{DFT}^{PEG\_chain*}$ (interaction) (eV) | $E_{DFT}^{PEG*}$ (solvation) (eV) | $\Delta H_{PEG*}$ (eV) | $\Delta ZPE_{PEG*}$ (eV) | $T\Delta S_{PEG*}$ (eV) |
|---------------|-------------------------|---------------------------------|----------------------------------------|------------------------------------------|--------------------------------------------|-----------------------------------|------------------------|--------------------------|-------------------------|
| 0.05          | 0.20                    | 2.00                            | 2.20                                   | -0.52                                    | -0.06                                      | -1.71                             | -2.30                  | -0.01                    | -0.92                   |
| 0.10          | 0.40                    | 4.00                            | 4.40                                   | -0.94                                    | -0.08                                      | -3.58                             | -4.60                  | -0.01                    | -1.84                   |
| 0.15          | 0.60                    | 6.00                            | 6.60                                   | -1.29                                    | -0.07                                      | -5.52                             | -6.89                  | -0.02                    | -2.76                   |
| 0.20          | 0.80                    | 8.00                            | 8.80                                   | -1.61                                    | -0.07                                      | -7.45                             | -9.14                  | -0.02                    | -3.68                   |
| 0.25          | 1.00                    | 10.00                           | 11.00                                  | -1.92                                    | -0.10                                      | -9.32                             | -11.34                 | -0.03                    | -4.60                   |
| 0.30          | 1.20                    | 12.00                           | 13.20                                  | -2.24                                    | -0.18                                      | -11.05                            | -13.47                 | -0.03                    | -5.52                   |
| 0.35          | 1.40                    | 14.00                           | 15.40                                  | -2.59                                    | -0.32                                      | -12.61                            | -15.52                 | -0.04                    | -6.44                   |
| 0.40          | 1.60                    | 16.00                           | 17.60                                  | -2.98                                    | -0.53                                      | -13.94                            | -17.45                 | -0.04                    | -7.36                   |
| 0.45          | 1.80                    | 18.00                           | 19.80                                  | -3.43                                    | -0.82                                      | -15.02                            | -19.27                 | -0.05                    | -8.28                   |
| 0.50          | 2.00                    | 20.00                           | 22.00                                  | -3.92                                    | -1.21                                      | -15.81                            | -20.93                 | -0.05                    | -9.20                   |
| 0.55          | 2.20                    | 22.00                           | 24.20                                  | -4.46                                    | -1.68                                      | -16.29                            | -22.43                 | -0.06                    | -10.12                  |
| 0.60          | 2.40                    | 24.00                           | 26.40                                  | -5.03                                    | -2.24                                      | -16.46                            | -23.74                 | -0.06                    | -11.04                  |
| 0.65          | 2.60                    | 26.00                           | 28.60                                  | -5.63                                    | -2.89                                      | -16.32                            | -24.84                 | -0.07                    | -11.96                  |
| 0.70          | 2.80                    | 28.00                           | 30.80                                  | -6.24                                    | -3.62                                      | -15.85                            | -25.71                 | -0.08                    | -12.88                  |
| 0.75          | 3.00                    | 30.00                           | 33.00                                  | -6.83                                    | -4.41                                      | -15.09                            | -26.33                 | -0.08                    | -13.80                  |
| 0.80          | 3.20                    | 32.00                           | 35.20                                  | -7.37                                    | -5.26                                      | -14.05                            | -26.68                 | -0.09                    | -14.72                  |
| 0.85          | 3.40                    | 34.00                           | 37.40                                  | -7.84                                    | -6.13                                      | -12.75                            | -26.72                 | -0.09                    | -15.64                  |
| 0.90          | 3.60                    | 36.00                           | 39.60                                  | -8.19                                    | -7.03                                      | -11.24                            | -26.45                 | -0.10                    | -16.56                  |
| 0.95          | 3.80                    | 38.00                           | 41.80                                  | -8.38                                    | -7.90                                      | -9.55                             | -25.83                 | -0.10                    | -17.48                  |
| 1.00          | 4.00                    | 40.00                           | 44.00                                  | -8.36                                    | -8.74                                      | -7.74                             | -24.85                 | -0.11                    | -18.40                  |

Table S14. continued

| Coverage (ML) | $N$  | H <sub>2</sub> O* desorption energy (eV/H <sub>2</sub> O) | Total H <sub>2</sub> O* desorption energy (eV) | $\Delta G_{ads}$ (eV) |
|---------------|------|-----------------------------------------------------------|------------------------------------------------|-----------------------|
| 0.05          | 0.20 | 0.08                                                      | 0.02                                           | -1.37                 |
| 0.10          | 0.40 | 0.08                                                      | 0.03                                           | -2.74                 |
| 0.15          | 0.60 | 0.08                                                      | 0.05                                           | -4.09                 |
| 0.20          | 0.80 | 0.08                                                      | 0.06                                           | -5.41                 |
| 0.25          | 1.00 | 0.08                                                      | 0.08                                           | -6.69                 |
| 0.30          | 1.20 | 0.08                                                      | 0.10                                           | -7.89                 |
| 0.35          | 1.40 | 0.08                                                      | 0.11                                           | -9.00                 |
| 0.40          | 1.60 | 0.08                                                      | 0.13                                           | -10.01                |
| 0.45          | 1.80 | 0.08                                                      | 0.14                                           | -10.89                |
| 0.50          | 2.00 | 0.08                                                      | 0.16                                           | -11.62                |
| 0.55          | 2.20 | 0.08                                                      | 0.18                                           | -12.19                |
| 0.60          | 2.40 | 0.08                                                      | 0.19                                           | -12.57                |
| 0.65          | 2.60 | 0.08                                                      | 0.21                                           | -12.74                |
| 0.70          | 2.80 | 0.08                                                      | 0.22                                           | -12.68                |

|      |      |      |      |        |
|------|------|------|------|--------|
| 0.75 | 3.00 | 0.08 | 0.24 | -12.37 |
| 0.80 | 3.20 | 0.08 | 0.26 | -11.79 |
| 0.85 | 3.40 | 0.08 | 0.27 | -10.90 |
| 0.90 | 3.60 | 0.08 | 0.29 | -9.70  |
| 0.95 | 3.80 | 0.08 | 0.30 | -8.15  |
| 1.00 | 4.00 | 0.08 | 0.32 | -6.23  |

Table S15. Data for  $\Delta G_{ads}$  of PEG-10\* on TiO<sub>2</sub>(101)

| Coverage (ML) | # of PEG* (#/unit cell) | # of PEG* monomer (#/unit cell) | # of oxygen atom in PEG* (#/unit cell) | $E_{DFT}^{PEG\_head*}$ (adsorption) (eV) | $E_{DFT}^{PEG\_chain*}$ (interaction) (eV) | $E_{DFT}^{PEG*}$ (solvation) (eV) | $\Delta H_{PEG*}$ (eV) | $\Delta ZPE_{PEG*}$ (eV) | $T\Delta S_{PEG*}$ (eV) |
|---------------|-------------------------|---------------------------------|----------------------------------------|------------------------------------------|--------------------------------------------|-----------------------------------|------------------------|--------------------------|-------------------------|
| 0.05          | 0.20                    | 2.00                            | 2.20                                   | -0.52                                    | -0.06                                      | -1.71                             | -2.30                  | -0.01                    | -0.64                   |
| 0.10          | 0.40                    | 4.00                            | 4.40                                   | -0.94                                    | -0.08                                      | -3.58                             | -4.60                  | -0.01                    | -1.27                   |
| 0.15          | 0.60                    | 6.00                            | 6.60                                   | -1.29                                    | -0.07                                      | -5.52                             | -6.89                  | -0.02                    | -1.91                   |
| 0.20          | 0.80                    | 8.00                            | 8.80                                   | -1.61                                    | -0.07                                      | -7.45                             | -9.14                  | -0.02                    | -2.55                   |
| 0.25          | 1.00                    | 10.00                           | 11.00                                  | -1.92                                    | -0.10                                      | -9.32                             | -11.34                 | -0.03                    | -3.19                   |
| 0.30          | 1.20                    | 12.00                           | 13.20                                  | -2.24                                    | -0.18                                      | -11.05                            | -13.47                 | -0.03                    | -3.82                   |
| 0.35          | 1.40                    | 14.00                           | 15.40                                  | -2.59                                    | -0.32                                      | -12.61                            | -15.52                 | -0.04                    | -4.46                   |
| 0.40          | 1.60                    | 16.00                           | 17.60                                  | -2.98                                    | -0.53                                      | -13.94                            | -17.45                 | -0.04                    | -5.10                   |
| 0.45          | 1.80                    | 18.00                           | 19.80                                  | -3.43                                    | -0.82                                      | -15.02                            | -19.27                 | -0.05                    | -5.74                   |
| 0.50          | 2.00                    | 20.00                           | 22.00                                  | -3.92                                    | -1.21                                      | -15.81                            | -20.93                 | -0.05                    | -6.37                   |
| 0.55          | 2.20                    | 22.00                           | 24.20                                  | -4.46                                    | -1.68                                      | -16.29                            | -22.43                 | -0.06                    | -7.01                   |
| 0.60          | 2.40                    | 24.00                           | 26.40                                  | -5.03                                    | -2.24                                      | -16.46                            | -23.74                 | -0.06                    | -7.65                   |
| 0.65          | 2.60                    | 26.00                           | 28.60                                  | -5.63                                    | -2.89                                      | -16.32                            | -24.84                 | -0.07                    | -8.29                   |
| 0.70          | 2.80                    | 28.00                           | 30.80                                  | -6.24                                    | -3.62                                      | -15.85                            | -25.71                 | -0.08                    | -8.92                   |
| 0.75          | 3.00                    | 30.00                           | 33.00                                  | -6.83                                    | -4.41                                      | -15.09                            | -26.33                 | -0.08                    | -9.56                   |
| 0.80          | 3.20                    | 32.00                           | 35.20                                  | -7.37                                    | -5.26                                      | -14.05                            | -26.68                 | -0.09                    | -10.20                  |
| 0.85          | 3.40                    | 34.00                           | 37.40                                  | -7.84                                    | -6.13                                      | -12.75                            | -26.72                 | -0.09                    | -10.84                  |
| 0.90          | 3.60                    | 36.00                           | 39.60                                  | -8.19                                    | -7.03                                      | -11.24                            | -26.45                 | -0.10                    | -11.47                  |
| 0.95          | 3.80                    | 38.00                           | 41.80                                  | -8.38                                    | -7.90                                      | -9.55                             | -25.83                 | -0.10                    | -12.11                  |
| 1.00          | 4.00                    | 40.00                           | 44.00                                  | -8.36                                    | -8.74                                      | -7.74                             | -24.85                 | -0.11                    | -12.75                  |

Table S15. continued

| Coverage (ML) | $N$  | H <sub>2</sub> O* desorption energy (eV/H <sub>2</sub> O) | Total H <sub>2</sub> O* desorption energy (eV) | $\Delta G_{ads}$ (eV) |
|---------------|------|-----------------------------------------------------------|------------------------------------------------|-----------------------|
| 0.05          | 0.20 | 0.08                                                      | 0.02                                           | -1.65                 |
| 0.10          | 0.40 | 0.08                                                      | 0.03                                           | -3.30                 |
| 0.15          | 0.60 | 0.08                                                      | 0.05                                           | -4.94                 |
| 0.20          | 0.80 | 0.08                                                      | 0.06                                           | -6.55                 |
| 0.25          | 1.00 | 0.08                                                      | 0.08                                           | -8.10                 |
| 0.30          | 1.20 | 0.08                                                      | 0.10                                           | -9.58                 |
| 0.35          | 1.40 | 0.08                                                      | 0.11                                           | -10.98                |

|      |      |      |      |        |
|------|------|------|------|--------|
| 0.40 | 1.60 | 0.08 | 0.13 | -12.27 |
| 0.45 | 1.80 | 0.08 | 0.14 | -13.43 |
| 0.50 | 2.00 | 0.08 | 0.16 | -14.45 |
| 0.55 | 2.20 | 0.08 | 0.18 | -15.30 |
| 0.60 | 2.40 | 0.08 | 0.19 | -15.96 |
| 0.65 | 2.60 | 0.08 | 0.21 | -16.42 |
| 0.70 | 2.80 | 0.08 | 0.22 | -16.64 |
| 0.75 | 3.00 | 0.08 | 0.24 | -16.61 |
| 0.80 | 3.20 | 0.08 | 0.26 | -16.31 |
| 0.85 | 3.40 | 0.08 | 0.27 | -15.71 |
| 0.90 | 3.60 | 0.08 | 0.29 | -14.79 |
| 0.95 | 3.80 | 0.08 | 0.30 | -13.52 |
| 1.00 | 4.00 | 0.08 | 0.32 | -11.88 |

Table S16. Data for  $\Delta G_{ads}$  of PEG-15\* on TiO<sub>2</sub>(101)

| Coverage (ML) | # of PEG* (#/unit cell) | # of PEG* monomer (#/unit cell) | # of oxygen atom in PEG* (#/unit cell) | $E_{DFT}^{PEG\_head^*}$ (adsorption) (eV) | $E_{DFT}^{PEG\_chain^*}$ (interaction) (eV) | $E_{DFT}^{PEG^*}$ (solvation) (eV) | $\Delta H_{PEG^*}$ (eV) | $\Delta ZPE_{PEG^*}$ (eV) | $T\Delta S_{PEG^*}$ (eV) |
|---------------|-------------------------|---------------------------------|----------------------------------------|-------------------------------------------|---------------------------------------------|------------------------------------|-------------------------|---------------------------|--------------------------|
| 0.05          | 0.20                    | 3.00                            | 3.20                                   | -0.52                                     | -0.10                                       | -2.49                              | -3.11                   | -0.02                     | -1.15                    |
| 0.10          | 0.40                    | 6.00                            | 6.40                                   | -0.94                                     | -0.12                                       | -5.21                              | -6.27                   | -0.05                     | -2.30                    |
| 0.15          | 0.60                    | 9.00                            | 9.60                                   | -1.29                                     | -0.11                                       | -8.03                              | -9.43                   | -0.07                     | -3.45                    |
| 0.20          | 0.80                    | 12.00                           | 12.80                                  | -1.61                                     | -0.11                                       | -10.84                             | -12.56                  | -0.09                     | -4.60                    |
| 0.25          | 1.00                    | 15.00                           | 16.00                                  | -1.92                                     | -0.16                                       | -13.55                             | -15.63                  | -0.11                     | -5.75                    |
| 0.30          | 1.20                    | 18.00                           | 19.20                                  | -2.24                                     | -0.27                                       | -16.08                             | -18.59                  | -0.14                     | -6.90                    |
| 0.35          | 1.40                    | 21.00                           | 22.40                                  | -2.59                                     | -0.47                                       | -18.34                             | -21.41                  | -0.16                     | -8.05                    |
| 0.40          | 1.60                    | 24.00                           | 25.60                                  | -2.98                                     | -0.79                                       | -20.28                             | -24.05                  | -0.18                     | -9.20                    |
| 0.45          | 1.80                    | 27.00                           | 28.80                                  | -3.43                                     | -1.23                                       | -21.84                             | -26.50                  | -0.20                     | -10.35                   |
| 0.50          | 2.00                    | 30.00                           | 32.00                                  | -3.92                                     | -1.81                                       | -22.99                             | -28.72                  | -0.23                     | -11.50                   |
| 0.55          | 2.20                    | 33.00                           | 35.20                                  | -4.46                                     | -2.52                                       | -23.70                             | -30.67                  | -0.25                     | -12.65                   |
| 0.60          | 2.40                    | 36.00                           | 38.40                                  | -5.03                                     | -3.37                                       | -23.95                             | -32.34                  | -0.27                     | -13.80                   |
| 0.65          | 2.60                    | 39.00                           | 41.60                                  | -5.63                                     | -4.34                                       | -23.73                             | -33.70                  | -0.29                     | -14.95                   |
| 0.70          | 2.80                    | 42.00                           | 44.80                                  | -6.24                                     | -5.43                                       | -23.06                             | -34.73                  | -0.32                     | -16.10                   |
| 0.75          | 3.00                    | 45.00                           | 48.00                                  | -6.83                                     | -6.62                                       | -21.95                             | -35.40                  | -0.34                     | -17.25                   |
| 0.80          | 3.20                    | 48.00                           | 51.20                                  | -7.37                                     | -7.89                                       | -20.43                             | -35.69                  | -0.36                     | -18.40                   |
| 0.85          | 3.40                    | 51.00                           | 54.40                                  | -7.84                                     | -9.20                                       | -18.55                             | -35.59                  | -0.38                     | -19.55                   |
| 0.90          | 3.60                    | 54.00                           | 57.60                                  | -8.19                                     | -10.54                                      | -16.34                             | -35.07                  | -0.41                     | -20.70                   |
| 0.95          | 3.80                    | 57.00                           | 60.80                                  | -8.38                                     | -11.86                                      | -13.89                             | -34.12                  | -0.43                     | -21.85                   |
| 1.00          | 4.00                    | 60.00                           | 64.00                                  | -8.36                                     | -13.12                                      | -11.26                             | -32.74                  | -0.45                     | -23.00                   |

Table S16. continued

| Coverage (ML) | $N$ | H <sub>2</sub> O* desorption energy (eV/H <sub>2</sub> O) | Total H <sub>2</sub> O* desorption energy (eV) | $\Delta G_{ads}$ (eV) |
|---------------|-----|-----------------------------------------------------------|------------------------------------------------|-----------------------|
|---------------|-----|-----------------------------------------------------------|------------------------------------------------|-----------------------|

|      |      |      |      |        |
|------|------|------|------|--------|
| 0.05 | 0.20 | 0.08 | 0.02 | -1.97  |
| 0.10 | 0.40 | 0.08 | 0.03 | -3.98  |
| 0.15 | 0.60 | 0.08 | 0.05 | -6.00  |
| 0.20 | 0.80 | 0.08 | 0.06 | -7.99  |
| 0.25 | 1.00 | 0.08 | 0.08 | -9.91  |
| 0.30 | 1.20 | 0.08 | 0.10 | -11.73 |
| 0.35 | 1.40 | 0.08 | 0.11 | -13.40 |
| 0.40 | 1.60 | 0.08 | 0.13 | -14.91 |
| 0.45 | 1.80 | 0.08 | 0.14 | -16.21 |
| 0.50 | 2.00 | 0.08 | 0.16 | -17.29 |
| 0.55 | 2.20 | 0.08 | 0.18 | -18.10 |
| 0.60 | 2.40 | 0.08 | 0.19 | -18.63 |
| 0.65 | 2.60 | 0.08 | 0.21 | -18.84 |
| 0.70 | 2.80 | 0.08 | 0.22 | -18.72 |
| 0.75 | 3.00 | 0.08 | 0.24 | -18.25 |
| 0.80 | 3.20 | 0.08 | 0.26 | -17.40 |
| 0.85 | 3.40 | 0.08 | 0.27 | -16.15 |
| 0.90 | 3.60 | 0.08 | 0.29 | -14.49 |
| 0.95 | 3.80 | 0.08 | 0.30 | -12.40 |
| 1.00 | 4.00 | 0.08 | 0.32 | -9.87  |

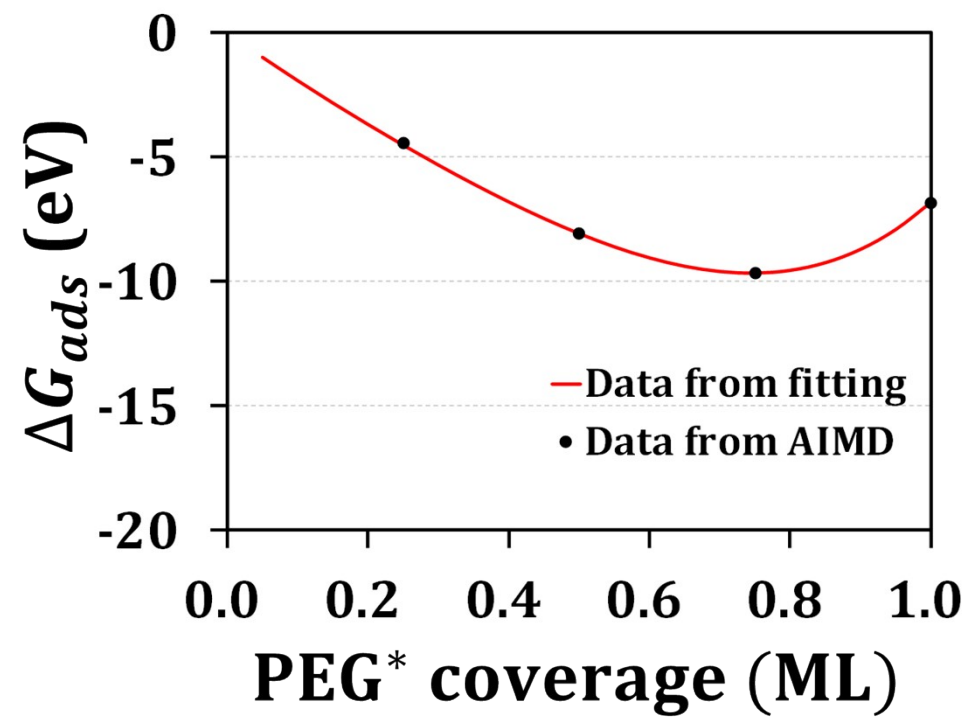

Fig. S13. Coverage-dependent  $\Delta G_{ads}$  for PEG-5\* on  $\text{TiO}_2(101)$ . The black dots represent the data points from Fig. 11 in the main text, while the red line is the data obtained using the fitting lines in Fig. 4 in the main text.



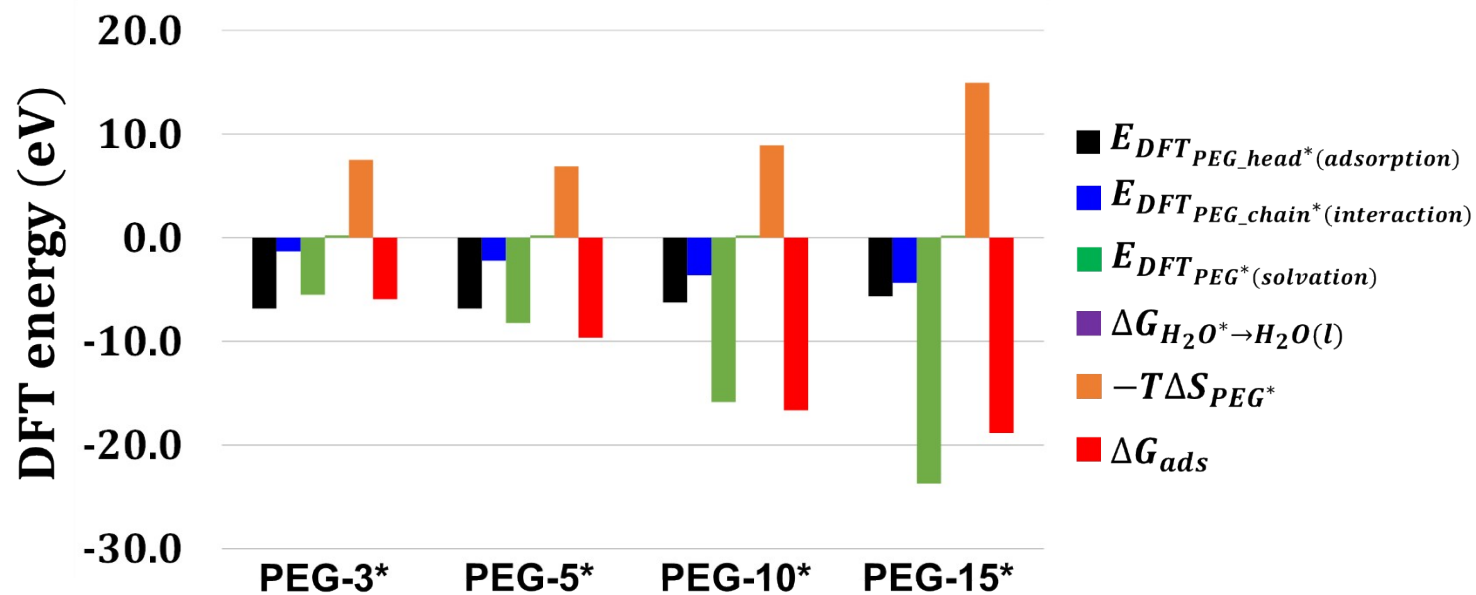

Fig. S14. Histograms for  $E_{DFT}^{PEG\_head^* (adsorption)}$ ,  $E_{DFT}^{PEG\_chain^* (interaction)}$ ,  $E_{DFT}^{PEG^* (solvation)}$ ,  $\Delta G_{H_2O^* \rightarrow H_2O(l)}$ ,  $-T\Delta S_{PEG^*}$ , and  $\Delta G_{ads}$  of PEG-3\*, PEG-5\*, PEG-10\*, and PEG-15\* at each saturated coverage.

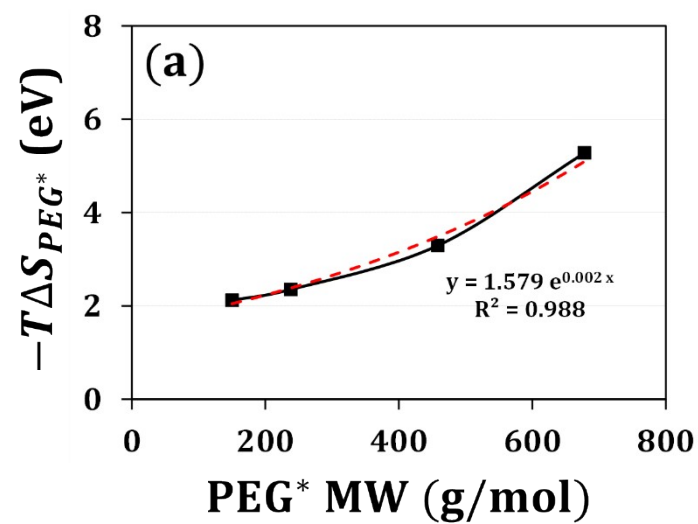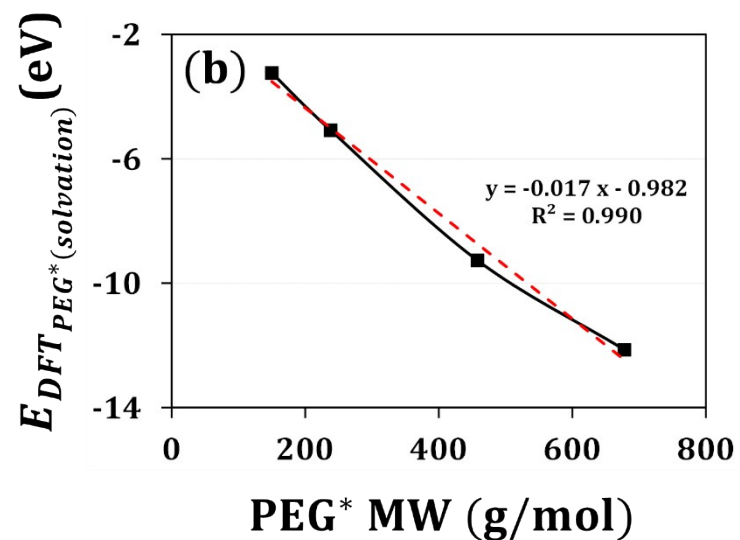

Fig. S15. PEG\* MW-dependent (a)  $-T\Delta S_{PEG^*}$  and (b)  $E_{DFT_{PEG^*(solvation)}}$ . The red dotted lines represent the trend lines.

### References

- S1. M. W. Chase, C. A. Davies, J. R. Downey, D. J. Frurip, R. A. McDonald and A. N. Syverud, *J. Phys. Chem. Ref. Data, Suppl.*, 1985, **14**, 1-926.
- S2. Y. A. Zhu, D. Chen, X. G. Zhou and W. K. Yuan, *Catal. Today*, 2009, **148**, 260-267.
- S3. G. Henkelman, B. P. Uberuaga and H. Jónsson, *J. Chem. Phys.*, 2000, **113**, 9901-9904.
